1  
2  
3  
4  
5  
6  
7  
8  
9  
10  
11  
12  
13  
14  
15  
16  
17  
18  
19  
20  
21  
22  
23  
24  
25  
26  
27  
28

**A repurposed, non-canonical cytochrome c, chaperones calcium binding by PilY1 for type IVa pili formation**

Marco Herfurth<sup>1</sup>, Anke Treuner-Lange<sup>1</sup>, Timo Glatter<sup>2</sup>, Nadine Wittmaack<sup>3</sup>, Egbert Hoiczky<sup>4</sup>, Antonio J. Pierik<sup>3</sup> & Lotte Sogaard-Andersen<sup>1, 5</sup>

<sup>1</sup> Max Planck Institute for Terrestrial Microbiology  
Department of Ecophysiology  
Karl-von-Frisch Str. 10  
35043 Marburg, Germany

<sup>2</sup> Max Planck Institute for Terrestrial Microbiology  
Core Facility for Mass Spectrometry & Proteomics  
Karl-von-Frisch Str. 10  
35043 Marburg, Germany

<sup>3</sup> Technical University Kaiserslautern  
Biochemistry, Faculty of Chemistry  
Erwin-Schrödinger-Strasse 54  
D-67663 Kaiserslautern, Germany

<sup>4</sup> The University of Sheffield  
Department of Molecular Biology and Biotechnology  
The Krebs Institute  
Firth Court, Western Bank  
Sheffield S10 2TN, United Kingdom

<sup>5</sup> Corresponding author  
Tel. +49-6421-178 201  
Fax +49-6421-178 209  
[E-mail: sogard@mpi-marburg.mpg.de](mailto:sogaard@mpi-marburg.mpg.de)

33

34 **Abstract**

35 Type IVa pili (T4aP) are versatile bacterial cell surface structures that undergo  
36 extension/adhesion/retraction cycles powered by the cell envelope-spanning T4aP machine. In  
37 this machine, a complex composed of four minor pilins and PilY1 primes T4aP extension and is  
38 also present at the pilus tip mediating adhesion. Similar to many other bacteria, *Myxococcus*  
39 *xanthus* contains multiple minor pilins/PilY1 sets that are incompletely understood. Here, we  
40 report that minor pilins and PilY1 (PilY1.1) of cluster\_1 form priming and tip complexes  
41 contingent on a non-canonical cytochrome *c* (TfcP) with an unusual His/Cys heme ligation and  
42 calcium. We provide evidence that TfcP is unlikely to participate in electron transport and has  
43 been repurposed to promote calcium binding by PilY1.1 at low calcium concentrations, thereby  
44 stabilising PilY1.1 and enabling T4aP function in a broader range of calcium concentrations.  
45 These results identify a novel function of cytochromes *c* and illustrate how incorporating an  
46 accessory factor expands the environmental range under which the T4aP system functions.

47

## 48 Introduction

49 In bacteria, motility is important for virulence, promotes colonisation of habitats of diverse  
50 composition, and stimulates biofilm formation<sup>1</sup>. Type IVa pili (T4aP) are filamentous cell surface  
51 structures that enable cell translocation across surfaces and also have critical functions in  
52 surface adhesion, surface sensing, host cell interaction, biofilm formation, predation, virulence,  
53 and DNA uptake<sup>2-4</sup>. The versatility of T4aP is based on their ability to undergo cycles of  
54 extension, surface adhesion, and retraction<sup>5,6</sup>. Retractions generate a force up to 150 pN per  
55 pilus and pull cells across surfaces<sup>7</sup>.

56 In Gram-negative bacteria, the extension/retraction cycles of T4aP are driven by the T4aP  
57 machine (T4aPM), which consists of 15 conserved proteins that form a complex that spans from  
58 the outer membrane (OM) across the periplasm and inner membrane (IM) to the cytoplasm<sup>8-10</sup>  
59 (Fig. 1a). Pilus extension and retraction are powered by the PilB and PilT ATPases,  
60 respectively, that bind in a mutually exclusive manner to the cytoplasmic base of the T4aPM<sup>8,11-</sup>  
61 <sup>13</sup>. All 15 proteins are essential for T4aP extension except for PilT, which is only important for  
62 retraction<sup>4</sup>. The so-called priming complex is an integral part of the T4aPM, is composed of the  
63 major pilin, four minor pilins and the PilY1 protein, and is incorporated into the machine  
64 independently of the PilB ATPase<sup>10,14</sup> (Fig. 1a). The five pilins interact directly to form a short  
65 pilus that is capped by PilY1, which interacts directly with the minor pilins<sup>10</sup>. Pilus extension is  
66 initiated by the incorporation of additional major pilin subunits from a reservoir in the IM to the  
67 base of the priming complex in a process stimulated by PilB<sup>6,10,14</sup>. Conversely, during retraction,  
68 major pilin subunits are removed from the base of the pilus and reinserted into the IM in a  
69 process stimulated by PilT<sup>12,15</sup>. Because the major pilin is added to the priming complex during  
70 the initiation of the extension process, the priming complex remains at the tip of the extended  
71 pilus<sup>10,14,16</sup>. Consistently, PilY1 is involved in surface adhesion, surface-sensing, specificity in  
72 host cell recognition during infections, and virulence<sup>14,16-19</sup>.

73 Among the 15 proteins of the T4aPM, nine are generally encoded by single copy genes<sup>20</sup>. Some  
74 species contain multiple PilT paralogs that enable retractions with different characteristics<sup>21</sup>. The  
75 genes for the four minor pilins and PilY1 are also often present in multiple copies<sup>10,22-24</sup>. The  
76 multiplicity of minor pilins and PilY1 proteins has been suggested to allow individual species to  
77 assemble priming complexes and tip complexes of different composition and with different  
78 properties, thereby allowing the formation of T4aP that can function in a variety of different  
79 habitats<sup>10,14,25</sup>. Minor pilins are low abundance proteins that share overall structure and  
80 sequence homology with the major pilin and have a prepilin signal peptide, a hydrophobic N-

81 terminal  $\alpha$ -helix, and a C-terminal globular domain, which is less conserved<sup>26</sup>. PilY1 proteins  
82 have a type I signal peptide, are secreted to the periplasm, and are composed of two domains.  
83 The conserved C-terminal PilY1-domain adopts a beta-propeller fold<sup>27</sup> that interacts with the  
84 minor pilins in the priming and tip complex<sup>10</sup> (Fig. 1a). The N-terminal domain is much less  
85 conserved and is the domain that mediates host cell recognition, adhesion and surface-  
86 sensing<sup>10,17,28</sup>.

87 The soil-dwelling  $\delta$ -proteobacterium *Myxococcus xanthus* uses T4aP-dependent motility  
88 (T4aPdM) and gliding motility to move on surfaces to generate spreading colonies in the  
89 presence of nutrients and spore-filled fruiting bodies in the absence of nutrients<sup>29,30</sup>. The *M.*  
90 *xanthus* genome contains three gene clusters (from here on cluster\_1, \_2 and \_3; proteins  
91 labelled with suffix 1, 2 and 3), each encoding four minor pilins and a PilY1 protein<sup>8,10</sup>. Cluster\_1  
92 alone and cluster\_3 alone support T4aPdM under standard conditions<sup>10</sup>. While the four  
93 respective minor pilins share overall sequence homology, the three PilY1 proteins are highly  
94 divergent in their N-terminal domains<sup>10</sup>. Thus, *M. xanthus* has the potential to generate at least  
95 two, and possibly three, different T4aPM and T4aP that differ in their priming and tip complexes,  
96 respectively.

97 To understand the functional range of the three minor pilin/PilY1 protein sets, we focused on the  
98 proteins of cluster\_1. Here, we provide evidence that these proteins form priming and tip  
99 complexes in a calcium-dependent manner. We identify the TfcP protein and show that it is a  
100 non-canonical cytochrome *c* with an unusual His/Cys heme ligation that is conditionally  
101 essential for cluster\_1-based T4aP formation and T4aPdM. Specifically, TfcP is important for  
102 PilY1.1 stability under low calcium conditions; PilY1.1, in turn, is important for the stability of the  
103 cluster\_1 minor pilins. The effect of TfcP on PilY1.1 stability depends on calcium binding by  
104 PilY1.1 and is bypassed at high calcium concentrations. Our data support a model whereby  
105 TfcP is a repurposed cytochrome *c* that promotes calcium binding by PilY1.1 at low calcium  
106 concentrations, thereby, allowing cluster\_1 to support T4aP function in a broader range of  
107 environmental conditions.

108

## 109 Results

### 110 TfcP is a non-canonical cytochrome c important for cluster 1-based T4aP formation

111 In addition to encoding four minor pilins (PilX1, PilW1, PilV1 and FimU1) and PilY1.1, cluster\_1  
112 contains an additional open reading frame (ORF) (Locus tag=*mxan\_0363*) (Fig. 1b), for which  
113 no homolog is present in cluster\_2 and cluster\_3. This ORF is conserved in gene clusters  
114 encoding minor pilins and PilY1 in other Myxococcales genomes (Fig. S1a). Sequence analysis  
115 of *Mxan\_0363* homologs revealed a type I signal peptide followed by a cytochrome c domain  
116 that includes a single cytochrome c signature motif CxxCH (ref.<sup>31</sup>), and a C-terminal extension  
117 enriched in Pro residues and charged amino acids (Fig. 1cd). C-type cytochromes are secreted  
118 to the periplasm in a Sec-dependent manner where they acquire the heme, which is covalently  
119 attached to the two Cys residues in the signature motif by thioether bonds, while the His residue  
120 is the proximal axial ligand of the heme iron<sup>32</sup>. ~90% of cytochromes c, the so-called canonical  
121 cytochromes c, have a Met or His residue ~60 residues downstream of the signature motif that  
122 serves as the second axial ligand of the heme iron<sup>31,33,34</sup>. Interestingly, in *Mxan\_0363* and  
123 homologs, this is a Cys residue (Cys<sup>91</sup> in *Mxan\_0363*) (Fig. 1cd), which is rarely found as the  
124 second axial ligand in c type cytochromes<sup>34,35</sup>. In the vicinity of Cys<sup>91</sup>, no conserved Met or His  
125 residues are present. All *Mxan\_0363* homologs except CYFUS\_005206 contain the C-terminal  
126 extension (Fig. 1cd), which lacks in canonical cytochromes c. Thus, *Mxan\_0363* has features in  
127 common with canonical cytochromes c but also distinct features. *Mxan\_0363* homologs were  
128 not identified in species other than the listed Myxococcales (Fig. 1cd). From here on, we refer to  
129 *Mxan\_0363* as TfcP for T4aP formation cytochrome c protein.

130 Consistent with the overlap of or short distances between stop and start codons for  
131 neighbouring genes (Fig. 1b), fragments were amplified in RT-PCR for all consecutive genes of  
132 cluster\_1 supporting that they constitute an operon (Fig. S1b).

133 To test whether TfcP is important for T4aP-formation or function, we generated in-frame  
134 deletions of *tfcP* and the remaining five cluster\_1 genes. The deletions were generated in a  
135 strain in which cluster\_2 and cluster\_3 had been deleted ( $\Delta 2\Delta 3$ \_cluster strain) because  
136 cluster\_1 and \_3 in the wild-type (WT) strain DK1622 function redundantly to support T4aP  
137 formation and T4aPdM<sup>10</sup>. From here on, we used the  $\Delta 2\Delta 3$ \_cluster strain as a reference strain  
138 and refer to it as the WT $_{\Delta 2\Delta 3}$  strain.

139 In motility assays for T4aPdM on 0.5% agar supplemented with 0.5% Casitone broth (CTT),  
140 WT $_{\Delta 2\Delta 3}$  generated the flares at the colony edge characteristic of T4aPdM, while the  $\Delta pIIA$

141 mutant, which lacks the major pilin PilA and served as a negative control, did not (Fig. 2a). As  
142 previously shown for cluster\_3 genes<sup>10</sup>, T4aPdM was abolished in the  $\Delta pilX1$ ,  $\Delta pilV1$ ,  $\Delta pilW1$   
143 and  $\Delta pilY1.1$  mutants and reduced in the  $\Delta fimU1$  mutant. Strikingly, T4aPdM was also abolished  
144 in the  $\Delta tfcP$  mutant. T4aPdM was restored in all six in-frame deletion mutants by ectopic  
145 expression of the relevant gene from a plasmid integrated in a single copy at the Mx8 *attB* site.

146 To pinpoint the mechanism causing the T4aPdM defect in the cluster\_1 mutants, we assessed  
147 T4aP formation in the six in-frame deletion mutants using a shearing assay. In this assay, T4aP  
148 are sheared off the cell surface, and the level of the major pilin PilA in the sheared fraction  
149 quantified by immuno-blot analysis (Fig. 2b). None of the five non-motile mutants formed  
150 detectable T4aP, while the  $\Delta fimU1$  mutant still assembled T4aP at a much-reduced level  
151 compared to the parent strain. For all six in-frame deletion mutants, the total cellular level of PilA  
152 was similar or slightly lower than in the parent WT $_{\Delta 2\Delta 3}$  strain. As expected, T4aP-formation in the  
153  $\Delta tfcP$  mutant was complemented by ectopic expression of *tfcP*.

154 To distinguish whether the defect in T4aP-formation was caused by lack of extension or by  
155 hyper-retractions, we examined T4aP-formation in the six in-frame deletion mutants additionally  
156 containing a  $\Delta pilT$  mutation and, thus, lacking the PilT retraction ATPase (Fig. 2c). The  
157 WT $_{\Delta 2\Delta 3}\Delta pilT$  strain formed T4aP at a highly increased level compared to WT $_{\Delta 2\Delta 3}$  consistent with  
158 previous observations for the WT $\Delta pilT$  strain<sup>12</sup>. In the absence of PilT, T4aP-formation was  
159 partially restored in the  $\Delta tfcP$  mutant, but at a much-reduced level compared to the WT $_{\Delta 2\Delta 3}\Delta pilT$   
160 strain. By contrast, T4aP-formation in the  $\Delta pilX1$ ,  $\Delta pilV1$ ,  $\Delta pilW1$  and  $\Delta pilY1.1$  mutants was not  
161 restored. For all in-frame deletion mutants except for the  $\Delta fimU1$  mutant, the total cellular level  
162 of PilA was lower than in WT $_{\Delta 2\Delta 3}\Delta pilT$  strain. We conclude that TfcP is important but not  
163 essential for cluster\_1-dependent T4aP extension while the three minor pilins PilX1, -V1 and -  
164 W1 as well as PilY1.1 are essential for T4aP-formation, and FimU1 plays a less important role.  
165 The observations are in agreement with similar experiments involving minor pilins and PilY1.3 of  
166 cluster\_3<sup>10</sup>.

167

#### 168 TfcP is important for PilY1.1 stability

169 To understand how TfcP might be involved in T4aP extension, we used proteomics on whole-  
170 cell extracts to quantify the accumulation of T4aPM components in WT $_{\Delta 2\Delta 3}$  and WT $_{\Delta 2\Delta 3}\Delta tfcP$   
171 strains. To increase sensitivity, we used targeted proteomics in which protein abundance is  
172 quantified relative to heavy labelled reference peptides of the proteins of interest (Methods). In

173 absence of TfcP, accumulation of 10 T4aPM components was largely unaffected, while the  
174 accumulation of the four minor pilins and PilY1.1 was strongly reduced (Fig. 3a). Because PilY1  
175 of cluster\_3 is important for the stability of cluster\_3 minor pilins<sup>10</sup>, we performed targeted  
176 proteomics on the WT<sub>Δ2Δ3</sub>Δ*pilY1.1* strain. In this strain, accumulation of the four minor pilins was  
177 also strongly reduced, while TfcP accumulation was increased (Fig. 3a). In immuno-blot  
178 analysis, we observed that in the absence of individual cluster\_1 minor pilins, accumulation of  
179 TfcP was increased and PilY1.1 unchanged (Fig. 3b). Immuno-blot analysis also confirmed that  
180 PilY1.1 accumulation was strongly reduced in the absence of TfcP while TfcP accumulation was  
181 increased in the absence of PilY1.1 (Fig. 3b). Altogether, these observations support that TfcP  
182 is important for accumulation of PilY1.1, which, in turn, is important for minor pilin accumulation.

183 To resolve whether the effect of the Δ*tfcP* mutation on PilY1.1 and the Δ*pilY1.1* mutation on  
184 minor pilin accumulation was due to altered transcription of the relevant genes or altered protein  
185 stability, we performed qRT-PCR analysis on total RNA from the WT<sub>Δ2Δ3</sub>, WT<sub>Δ2Δ3</sub>Δ*tfcP* and  
186 WT<sub>Δ2Δ3</sub>Δ*pilY1.1* strains. Transcript levels of the cluster\_1 genes were increased in the Δ*tfcP* and  
187 the Δ*pilY1.1* mutants (Fig. 3c), suggesting negative feedback regulation of cluster\_1 genes.  
188 While the mechanism involved in this regulation remains unresolved, these results do not  
189 support that the reduced levels of PilY1.1/minor pilins and minor pilins in the absence of TfcP  
190 and PilY1.1, respectively are caused by reduced synthesis. Rather they support that TfcP  
191 stabilises PilY1.1, which, in turn, stabilises the four minor pilins. Accumulation dependencies  
192 have also been reported for the cluster\_3 proteins in which PilY1.3 and minor pilins interact  
193 directly to mutually stabilise each other<sup>10</sup>.

194 In *M. xanthus*, the T4aPM assembles at the two poles<sup>10,36-38</sup>. To exclude that deletion of *tfcP*  
195 affects assembly of the T4aPM, we used the bipolar localisation of the cytoplasmic protein PilM  
196 as proxy for T4aPM assembly<sup>37</sup>. We observed bipolar localisation of an active mCherry-PilM  
197 fusion in most cells of the WT<sub>Δ2Δ3</sub> and WT<sub>Δ2Δ3</sub>Δ*tfcP* strains (Fig. 3d), supporting that TfcP is not  
198 important for assembly of the remaining proteins into rudimentary T4aPM.

199

#### 200 TfcP is a periplasmic protein

201 To understand how TfcP stabilises PilY1.1, we determined its subcellular localisation using  
202 active TfcP-FLAG and TfcP-sfGFP fusions expressed at native or slightly above native levels  
203 from the endogenous locus (Fig. 4ab). Cells of WT<sub>Δ2Δ3</sub> synthesizing TfcP-FLAG were  
204 fractionated into fractions enriched for soluble, IM and OM proteins. TfcP-FLAG was present in

205 the soluble fraction while the control proteins fractionated as described<sup>12,36</sup> (Fig. 4c). Because  
206 sequence analysis of TfcP predicted a type I signal peptide, this experiment supports that TfcP  
207 localises to the periplasm similarly to PilY1 proteins<sup>10</sup>. In agreement with these observations, in  
208 fluorescence microscopy, TfcP-sfGFP localised along the entire cell periphery and foci  
209 formation was not observed (Fig. 4d).

210 To determine whether TfcP is present in pili, we purified pili from the WT<sub>Δ2Δ3</sub>Δ*pilT* mutant (Fig.  
211 S2a) and used label-free quantitative proteomics to quantify cluster\_1 proteins. All cluster\_1  
212 proteins except TfcP were detected in low amounts relative to the PilA major pilin (Fig. 4e) as  
213 described for cluster\_3 proteins<sup>10</sup>.

214 Altogether, these observations support that the minor pilins and PilY1.1 of cluster\_1 form a  
215 priming complex in the T4aPM for T4aP extension as well as a pilus tip complex. We also  
216 conclude that TfcP is a soluble, periplasmic protein that stabilises PilY1.1, and that TfcP is  
217 incorporated into neither the T4aPM nor T4aP. These findings together with previous results  
218 that all proteins that are incorporated into the T4aPM localise (bi)polarly<sup>10,36-38</sup>, suggest that the  
219 stabilising effect of TfcP on PilY1.1 occurs in the periplasm and before PilY1.1 incorporation into  
220 the T4aPM.

221

222 TfcP is a non-canonical cytochrome c with a low redox potential and heme binding is important  
223 for TfcP stability *in vivo*.

224 We overexpressed and purified a MalE-tagged TfcP variant (MalE-TfcP) from *Escherichia coli* to  
225 assess its heme-binding and redox characteristics (Fig. S2b). The fusion for overexpression  
226 contains the MalE type I signal peptide and lacks the TfcP signal peptide. Purified MalE-TfcP  
227 exhibited a distinct red colour indicating that it binds heme (Fig 5a). Oxidised MalE-TfcP had  
228 strong peroxidase activity (Fig. 5a) in agreement with heme-containing proteins having intrinsic  
229 peroxidase activity<sup>39</sup>. Importantly, peroxidase activity was inhibited when MalE-TfcP was  
230 reduced by dithiothreitol (DTT), supporting that this activity results from oxidised heme bound to  
231 MalE-TfcP<sup>40</sup>.

232 To assess the heme-binding properties of TfcP, we used UV-Vis spectroscopy. MalE-TfcP has a  
233 cytochrome c-like spectrum with a strong Soret-peak in the oxidised form and after reduction  
234 with sodium-dithionite (Fig. 5b). In the spectrum of reduced TfcP, the  $\alpha$ - and  $\beta$ -peak become  
235 visible in the 550 nm region. This fits well to spectra of canonical cytochromes c. Interestingly,  
236 we did not observe a red-shift of the Soret-peak from the oxidised to the reduced spectrum. For



237 canonical cytochromes *c* with His/His or His/Met coordination a 10 nm bathochromic shift  
238 typically observed, while a semisynthetic cytochrome *c* with His/Cys coordination of the heme  
239 iron did not exhibit this shift<sup>35,41,42</sup>, suggesting that Cys<sup>91</sup> (Fig. 1cd) is the second axial ligand in  
240 TfcP and responsible for the lack of the red-shift. This is also supported by the presence of a  
241 peak at 360 nm in the oxidised spectrum, which has been reported for His/Cys ligation<sup>43</sup>. The  
242 presence of cysteine-to-Fe<sup>3+</sup> charge transfer bands at ~630 nm and ~730 nm in the oxidised  
243 form, which disappear upon dithionite reduction (Fig. 5b, inset), are also in full agreement with  
244 spectral properties of His/Cys coordinated *c*-type cytochromes<sup>35</sup>. To further support that the  
245 special spectral properties are due to Cys<sup>91</sup>, we purified the MalE-TfcP<sup>C91M</sup> variant (Fig. S2b). In  
246 this variant, a red-shift was observed upon reduction of the protein (Fig 5c). In addition, the  
247 360 nm peak was not detected in the oxidised form. We conclude that Cys<sup>91</sup> is the second axial  
248 ligand of the heme iron in TfcP and that TfcP is an unusual cytochrome *c*.

249 We used electron paramagnetic resonance (EPR)-spectroscopy to investigate the environment  
250 of the heme-center. We obtained *g*-values of 2.51, 2.26 and 1.88 (Fig. 5d) that fit well to the *g*-  
251 values observed for multiple heme-containing proteins with a cysteine thiolate ligated heme  
252 iron<sup>44</sup>. Cytochromes *c* with a distal Cys were reported to have a very low midpoint potential in  
253 the range of -350 mV while canonical cytochromes *c* have a potential of approximately  
254 +250 mV<sup>35,41,42,45</sup>. To determine whether TfcP has a similarly low redox-potential, we used UV-  
255 Vis and EPR monitored redox titrations. For the UV-Vis redox-titration, MalE-TfcP was  
256 incubated with a redox-mediator cocktail. Spectra and potentials were recorded in five-minute  
257 intervals after addition of sodium-dithionite. After plotting the absorbance change at 550 nm  
258 versus the potential and fitting to the Nernst equation, the midpoint potential was determined as  
259  $E_m = -304 \pm 8$  mV, where 8 mV represent the intrinsic fitting error in one experiment (Fig. 5e). In  
260 the EPR-monitored redox titration, we followed the change of *g*=2.26 EPR signal in frozen  
261 samples obtained by sequential reduction with sodium-dithionite in the presence of mediators  
262 and found a midpoint potential of  $E_m = -320 \pm 15$  mV, where 15 mV represent the intrinsic fitting  
263 error in one experiment. Overall, both experiments support that TfcP has a very low redox-  
264 potential. The slight difference between the two experiments is likely due to pH changes, which  
265 occur during freezing. The low redox potential (approx. -312 mV) indicates that TfcP is not likely  
266 to be part of a respiratory chain in *M. xanthus* (see Discussion).

267 To clarify whether the heme-binding characteristics of TfcP is important for activity *in vivo*, we  
268 substituted the two Cys residues to Ala in the C<sup>31</sup>xxCH heme-binding motif and Cys<sup>91</sup> to His or  
269 Met (Fig. 1cd). The variants were synthesised ectopically as FLAG-tagged proteins in the  $\Delta tfcP$

270 mutant from the strong *pilA* promoter. None of the variants complemented the motility defect in  
271 the  $\Delta tfcP$  mutant, while the WT protein did (Fig. S3a). However, all three mutant variants  
272 accumulated at much-reduced levels compared to TfcP and TfcP-FLAG expressed from the  
273 native site, and none of the three mutant variants supported PilY1.1 accumulation (Fig. S3b).  
274 These observations demonstrate that heme-binding and distal coordination of the heme iron are  
275 important for TfcP stability.

276 Also, a FLAG-tagged TfcP $\Delta^{118-153}$  variant lacking the C-terminal extension was not able to  
277 complement the T4aPdM defect in the  $\Delta tfcP$  mutant (Fig. S3a), accumulated at a reduced level,  
278 and did not support PilY1.1 accumulation (Fig. S3b), providing experimental support for the  
279 functional relevance of this C-terminal extension.

280

### 281 Added calcium restores T4aP-formation in the absence of TfcP

282 Several PilY1 proteins have been shown to bind calcium using an EF-hand-like motif in the C-  
283 terminal domain, and calcium binding is important for function<sup>27,46,47</sup>. PilY1.1 and PilY1.2 also  
284 contain the consensus EF-hand-like calcium binding Dx[DN]xDGxxD motif in the C-terminal  
285 PilY1 domain, while PilY1.3 has two calcium binding motifs in the N-terminal domain (Fig. 6a).  
286 In a homology model of the C-terminal domain of PilY1.1, the D<sup>1165</sup>xDxDNxxD<sup>1173</sup> motif is  
287 located in a surface exposed loop between two  $\beta$ -strands as described for the PilY1 domain of  
288 *Pseudomonas aeruginosa*<sup>27</sup> (Fig. 6b).

289 To address the effect of calcium on T4aPdM, we first considered that the previous experiments  
290 were performed either in 1.0% CTT (targeted proteome analyses and qRT-PCR), which has a  
291 calcium concentration of  $\sim 30 \mu\text{M}$  according to the manufacturer, or on 0.5% agar supplemented  
292 with 0.5% CTT (motility assays) or 1.5% agar supplemented with 1.0% CTT (T4aP purification).  
293 The estimated calcium concentration of 0.5% agar is  $\sim 0.15 \text{ mM}$ <sup>48</sup>. Next, we repeated the assays  
294 for T4aPM in the presence of additional  $\text{CaCl}_2$ . To ensure that the effect of added  $\text{CaCl}_2$  could  
295 be attributed to T4aP, we used the  $\text{WT}_{\Delta 2\Delta 3}\Delta aglQ$  strain, which lacks the AglQ motor for  
296 gliding<sup>49,50</sup>. In the presence of  $\geq 0.25 \text{ mM}$  added  $\text{CaCl}_2$ ,  $\text{WT}_{\Delta 2\Delta 3}\Delta aglQ$  exhibited a dramatic  
297 change of motility pattern from expansion in flares to a radial film-like expansion (Fig. 6c).  
298 Intriguingly, the  $\text{WT}_{\Delta 2\Delta 3}\Delta aglQ\Delta tfcP$  mutant also responded to increasing calcium concentrations.  
299 At added  $\text{CaCl}_2$  concentrations  $\geq 0.5 \text{ mM}$ , this mutant regained T4aPdM and at 1.0 mM  
300 displayed a motility pattern similar to that of the parent strain. By contrast, added  $\text{CaCl}_2$  did not  
301 restore T4aPdM in the  $\text{WT}_{\Delta 2\Delta 3}\Delta pilY1.1$  mutant even at 10 mM (Fig. 6c; Fig. S4ab). Likewise,

302 10 mM CaCl<sub>2</sub> did not restore T4aPdM in the  $\Delta pilX1$ ,  $\Delta pilV1$ ,  $\Delta pilW1$  and  $\Delta pilA$  mutants while the  
303  $\Delta fimU1$  mutant displayed the same radial motility pattern as the parent strain (Fig. S4a). In  
304 additional experiments, we observed that WT <sub>$\Delta 2\Delta 3$</sub>  $\Delta aglQ$  responded to added CaCl<sub>2</sub>  
305 concentrations as low as 0.025 mM while the WT <sub>$\Delta 2\Delta 3$</sub>  $\Delta aglQ\Delta tfcP$  only responded at  $\geq 0.5$  mM  
306 (Fig. S4b). In control experiments, we observed that neither 5 mM NaCl nor 5 mM MgCl<sub>2</sub>  
307 restored motility in the WT <sub>$\Delta 2\Delta 3$</sub>  $\Delta tfcP$  mutant. We also observed that a strain only containing  
308 cluster\_3 responded to added CaCl<sub>2</sub> with an altered expansion pattern; however, this pattern  
309 was only evident at added CaCl<sub>2</sub> concentrations  $\geq 0.25$  mM (Fig. S4b). We conclude that CaCl<sub>2</sub>  
310 at an added concentration of 1.0 mM restores T4aPdM in the WT <sub>$\Delta 2\Delta 3$</sub>  $\Delta tfcP$  strain. From here on,  
311 we used an added CaCl<sub>2</sub> concentration of 1.0 mM.

312 Consistent with the effect of added CaCl<sub>2</sub> on motility, the WT <sub>$\Delta 2\Delta 3$</sub>  $\Delta tfcP$  mutant formed T4aP in  
313 the presence of 1.0 mM CaCl<sub>2</sub> based on the shearing assay, while the WT <sub>$\Delta 2\Delta 3$</sub>  $\Delta pilY1.1$  mutant  
314 did not (Fig. 6d). Added CaCl<sub>2</sub> also increased the amount of shearable pili in WT <sub>$\Delta 2\Delta 3$</sub> . The level  
315 of T4aP in the WT <sub>$\Delta 2\Delta 3$</sub>  $\Delta tfcP$  mutant was lower than in WT <sub>$\Delta 2\Delta 3$</sub>  (Fig. 6d). Calcium also increased  
316 the amount of total cellular PilA in all strains (Fig. 6d). The retraction deficient strains  
317 WT <sub>$\Delta 2\Delta 3$</sub>  $\Delta pilT$  and WT <sub>$\Delta 2\Delta 3$</sub>  $\Delta tfcP\Delta pilT$  assembled more T4aP in the presence of added CaCl<sub>2</sub> than  
318 in the absence supporting that calcium stimulates T4aP-formation rather than counteracting  
319 retractions (Fig. 6d). We conclude that 1.0 mM added CaCl<sub>2</sub> can substitute for TfcP function in  
320 T4aP-formation and T4aPdM.

321

### 322 TfcP enhances calcium-dependent stabilisation of PilY1.1

323 To understand how a high concentration of calcium compensates for lack of TfcP, we used  
324 targeted proteomics. In WT <sub>$\Delta 2\Delta 3$</sub> , 1.0 mM CaCl<sub>2</sub> caused an increase in PilA abundance and a  
325 decrease in TfcP abundance while accumulation of other T4aPM components including the  
326 remaining cluster\_1 proteins was largely unaffected (Fig. 6e). In the WT <sub>$\Delta 2\Delta 3$</sub>  $\Delta tfcP$  mutant, added  
327 CaCl<sub>2</sub> not only caused an increase in PilA abundance but also increased the abundance of all  
328 remaining cluster\_1 proteins including PilY1.1 (Fig. 6e). In the WT <sub>$\Delta 2\Delta 3$</sub>  $\Delta pilY1.1$  mutant, extra  
329 CaCl<sub>2</sub> also caused increased PilA abundance, but a reduction in TfcP abundance as in the  
330 WT <sub>$\Delta 2\Delta 3$</sub>  parent strain. PilW1 and FimU1 abundance was unaffected by added CaCl<sub>2</sub> in  
331 WT <sub>$\Delta 2\Delta 3$</sub>  $\Delta pilY1.1$ , while PilV1 and PilX1 abundance increased. We conclude that a high  
332 concentration of CaCl<sub>2</sub> causes increased PilY1.1 accumulation in the absence of TfcP. In  
333 addition, extra CaCl<sub>2</sub> also caused (1) increased PilA accumulation independently of TfcP and

334 PilY1.1, (2) decreased accumulation of TfcP independently of PilY1.1, and (3) increased  
335 accumulation of the minor pilins PilX1 and PilV1 independently of PilY1.1.

336 Because changes in extracellular calcium can cause altered gene expression<sup>51</sup>, we performed  
337 qRT-PCR analyses to discriminate whether added CaCl<sub>2</sub> affects transcription or protein stability.  
338 We observed significant changes in the transcription of all cluster\_1 genes as well as of *pilA* in  
339 response to added CaCl<sub>2</sub> (Fig. 6f); however, generally, these changes did not correlate with the  
340 altered protein accumulation profiles. For instance, in WT<sub>Δ2Δ3</sub>, 1.0 mM added CaCl<sub>2</sub> caused (1)  
341 increased PilA accumulation but *pilA* transcription was decreased, and (2) decreased *pilY1.1*  
342 transcription but PilY1.1 abundance remained unchanged, and in the WT<sub>Δ2Δ3</sub>Δ*tfcP* mutant,  
343 added CaCl<sub>2</sub> caused decreased *pilY1.1* transcription but PilY1.1 abundance increased. We  
344 conclude that added CaCl<sub>2</sub> at 1.0 mM can substitute for TfcP in stabilising PilY1.1.

345 Label-free quantitative proteomics of purified pili from WT<sub>Δ2Δ3</sub>Δ*pilT* and WT<sub>Δ2Δ3</sub>Δ*pilT*Δ*tfcP* (Fig.  
346 S2a) revealed a strong increase in the abundance of cluster\_1 minor pilins and PilY1.1 relative  
347 to PilA in the presence of calcium (Fig. 6g) suggesting that calcium also stabilises minor pilins  
348 and PilY1.1 in the tip complex. Of note, TfcP was also not detected in purified pili from  
349 WT<sub>Δ2Δ3</sub>Δ*pilT* grown in the presence of added calcium (Fig. 6g).

350 To determine whether the effect of calcium on PilY1.1 stability depends on its binding to PilY1.1,  
351 we attempted to purify full-length PilY1.1 or its C-terminal domain but were unsuccessful, thus,  
352 precluding *in vitro* analyses of the calcium binding properties of PilY1.1. Therefore, to assess  
353 calcium binding by PilY1.1 *in vivo*, we introduced the Asp<sup>1173</sup> to Ala substitution in the EF-hand-  
354 like calcium binding D<sup>1165</sup>xDxDNxxD<sup>1173</sup> motif in PilY1.1 (Fig. 6b) and expressed the protein from  
355 the native site in WT<sub>Δ2Δ3</sub> strains. The homologous substitution in other PilY1 proteins disrupts  
356 calcium binding without affecting the overall structure of the C-terminal beta-propeller  
357 domain<sup>27,46,47</sup>.

358 The *pilY1.1*<sup>D1173A</sup>*tfcP*<sup>+</sup> mutant was strongly reduced in T4aPdM in the absence of added CaCl<sub>2</sub>  
359 (Fig. 7a); however, this strain regained T4aPdM and was indistinguishable from the parent  
360 strain at ≥0.25 mM added CaCl<sub>2</sub>. By contrast, the *pilY1.1*<sup>D1173A</sup>Δ*tfcP* strain was non-motile even  
361 at 10 mM added CaCl<sub>2</sub>. These observations support that calcium binding is important for PilY1.1  
362 function and that PilY1.1<sup>D1173A</sup> is fully functional at elevated calcium concentrations but only if  
363 TfcP is present.

364 Consistent with the observations for T4aPdM, PilY1.1<sup>D1173A</sup> accumulation was reduced in the  
365 *pilY1.1*<sup>D1173A</sup>*tfcP*<sup>+</sup> mutant in the absence of added CaCl<sub>2</sub>, and 1.0 mM CaCl<sub>2</sub> at least partially

366 restored its accumulation (Fig. 7b). By contrast, in the *pilY1.1<sup>D1173A</sup>ΔtfcP* strain, PilY1.1<sup>D1173A</sup> was  
367 detected at very low levels in the absence of added CaCl<sub>2</sub> and did not increase upon addition of  
368 CaCl<sub>2</sub>. Thus, PilY1.1<sup>D1173A</sup> depends on TfcP for stability, and responds to added calcium only in  
369 the presence of TfcP. By comparison, PilY1.1<sup>WT</sup>, is fully functional at ≥1.0 mM added CaCl<sub>2</sub> in  
370 the absence of TfcP (Fig. 6c).

371 Finally, to determine whether TfcP can stabilise PilY1.1<sup>WT</sup> independently of calcium, we  
372 analysed PilY1.1 accumulation in the presence of the highly specific calcium chelator BAPTA  
373 (1,2-bis(o-aminophenoxy)ethane-N,N,N',N'-tetraacetic acid). In WT<sub>Δ2Δ3</sub> cells expressing TfcP-  
374 FLAG from the endogenous site and grown in 1.0% CTT, PilY1.1 was still detected in the  
375 presence of 40 μM but not in the presence of 80 μM BAPTA while TfcP was detected under all  
376 conditions and increased upon BAPTA addition (Fig. 7c). These observations strongly support  
377 that TfcP can only stabilise PilY1.1 in the presence of calcium. Because CaCl<sub>2</sub> can stabilise  
378 PilY1.1 in the absence of TfcP, these observations suggest that the primary function of TfcP is  
379 to chaperone calcium binding by PilY1.1 at low calcium concentrations.

380

## 381 Discussion

382 Here, we identify TfcP, a repurposed, non-canonical cytochrome *c*, as a novel protein important  
383 for cluster\_1-dependent T4aP formation in *M. xanthus* at low calcium concentrations. We  
384 demonstrate that TfcP stabilises PilY1.1 at low calcium concentrations. PilY1.1, in turn,  
385 stabilises the four minor pilins of cluster\_1 in that way enabling the formation of the cluster\_1-  
386 based priming complex in the T4aPM and, thus, T4aP formation. Bacteria in their natural  
387 habitats experience large fluctuations in environmental conditions and depend on adaptive  
388 strategies to endure such changes. TfcP expands the range of calcium concentrations under  
389 which cluster\_1 encoded minor pilins and PilY1.1 can support T4aPdM thereby increasing  
390 fitness of *M. xanthus* under changing environmental conditions and enabling colonisation of  
391 habitats with low calcium concentrations (Fig. 8).

392 Several lines of evidence support that that the effect of TfcP on PilY1.1 stability is calcium-  
393 dependent. First, under standard conditions, *M. xanthus* is exposed to ~30  $\mu$ M calcium in CTT  
394 suspension culture and ~0.15 mM calcium on 0.5% agar-plates for motility assays. Under these  
395 conditions, TfcP is important for PilY1.1 stability. However, at concentrations  $\geq$ 1 mM added  
396 CaCl<sub>2</sub>, calcium alone is sufficient to stabilise PilY1.1 independently of TfcP. Second, in the  
397 complete absence of calcium, i.e. after addition of the calcium specific chelator BAPTA, TfcP  
398 does not stabilise PilY1.1 while TfcP still accumulates. Third, the PilY1.1<sup>D1173A</sup> variant, which is  
399 predicted to bind calcium with reduced affinity, depends on TfcP for stability at 1.0 mM added  
400 CaCl<sub>2</sub>, and even at 10 mM CaCl<sub>2</sub>, this protein is non-functional in the absence of TfcP. Thus,  
401 TfcP and calcium both function to stabilise PilY1.1. However, while high calcium concentrations  
402 alone can stabilise PilY1.1, TfcP cannot stabilise PilY1.1 in the absence of calcium. Altogether,  
403 these findings support a model whereby calcium binding by PilY1.1 is the primary determinant  
404 for its stability, and in which TfcP stabilises PilY1.1 at low calcium concentrations by  
405 chaperoning calcium binding by PilY1.1. The functional outcome of this TfcP-dependent  
406 stimulation of calcium binding by PilY1.1 is that PilY1.1 accumulates at low calcium  
407 concentrations and is able to support cluster\_1-dependent T4aP formation and T4aPdM. Many  
408 myxobacteria including *M. xanthus* are found in terrestrial habitats in which calcium  
409 concentrations are described to vary from 0.1-1.0 mM at root-soil interfaces, 3.4-14 mM in some  
410 soils and as low as 10-150  $\mu$ M in other soils<sup>52</sup>. We suggest that TfcP is key to enabling PilY1.1-  
411 dependent T4aP formation and T4aPdM in the lower range of calcium concentrations.  
412 Interestingly, *M. stipitatus* and *Coralloccoccus coralloides* only have one gene cluster for minor  
413 pilins and PilY1, and this cluster encodes a TfcP ortholog (Fig. 1c; Fig. S1a) emphasising the  
414 importance of TfcP in T4aPdM in myxobacteria.

415 TfcP is a periplasmic protein and contains a non-canonical cytochrome *c* domain in which the  
416 second axial heme ligand is a Cys residue rather than the more common His and Met residues  
417 in canonical cytochromes *c*. Accordingly, TfcP has a very low redox potential of -304 to -320 mV  
418 based on two methods. Moreover, TfcP variants unable to bind heme or with altered heme-  
419 binding properties are unstable *in vivo*. *M. xanthus* is strictly aerobic and the genome encodes  
420 complex I-IV of the electron transport chain<sup>53</sup>. Thus, the low redox-potential of TfcP supports  
421 that it is not part of the respiratory chain, which starts with a potential of -320 mV for the redox  
422 pair NAD/NADH<sup>54</sup>. Some cytochromes *c* are involved in electron transport across the OM to  
423 external electron acceptors; however, these proteins are canonical cytochromes *c*<sup>55</sup> suggesting  
424 that TfcP also does not engage in this type of electron transport. Some *c*-type cytochromes with  
425 His/Cys ligation, e.g. the triheme DsrJ of *Allochromatium vinosum*, are involved in dissimilatory  
426 sulfur metabolism in which sulfate is used as terminal electron acceptor<sup>56</sup>. Other *c*-type  
427 cytochromes with His/Cys ligation have been suggested to have a role in signalling<sup>35,57</sup>.  
428 Because *M. xanthus* does not respire on sulfate, it is unlikely that TfcP would be involved in  
429 dissimilatory sulfur metabolism. While we cannot rule out a function of TfcP in signalling, our  
430 data support a scenario in which TfcP is a repurposed cytochrome *c* that is no longer involved in  
431 electron transport, and in which the covalently bound heme serves a structural function to  
432 stabilise TfcP. This “inert” cytochrome *c* then chaperones calcium binding by PilY1.1 at low  
433 calcium concentrations. TfcP also differs from canonical cytochromes *c* by having a C-terminal  
434 extension. This extension is important for TfcP stability; however, its precise function remains to  
435 be uncovered.

436 PilY1 proteins of *P. aeruginosa*, *Kingella kingae* and *Neisseria gonorrhoeae* bind calcium using  
437 an EF-hand-like calcium binding motif in their C-terminal PilY1 domain (Fig. 6b). An Asp to Ala  
438 substitution of the C-terminal Asp residue in this motif abolishes calcium binding and renders  
439 the proteins non-functional while overall still folding correctly<sup>27,46,47</sup>. The corresponding  
440 substitution in the D<sup>1165</sup>xDxDNxxD<sup>1173</sup> motif in PilY1.1 increased its dependency on TfcP and  
441 calcium for stability supporting that PilY1.1 binds calcium as described for other PilY1 proteins.  
442 However, while the PilY1 variants of *P. aeruginosa*, *K. kingae* and *N. gonorrhoeae* deficient in  
443 calcium binding accumulate, PilY1.1 depends on TfcP for stability at low calcium levels. Also,  
444 PilY1.1<sup>D1173A</sup> only accumulates at very low levels even in the presence of calcium and TfcP,  
445 suggesting that PilY1.1 binds calcium with a lower affinity than the three other PilY1 proteins.  
446 The observation that PilY1.1 is unstable in the absence of TfcP at low calcium concentrations  
447 suggest that the two proteins interact directly. However, such an interaction remains to be  
448 shown and will be addressed in future experiments. PilY1.1 as well as the four minor pilins of

449 cluster\_1 were detected in purified pili as previously shown for the minor pilins and PilY1.3 of  
450 cluster\_3<sup>10</sup>. By contrast, we did not detect TfcP in purified pili. We previously showed that  
451 sfGFP-tagged PilY1.3 and the sfGFP-tagged minor pilin PilW3 of cluster\_3 localise polarly, are  
452 incorporated into the T4aPM but do not support pilus extension likely because the sfGFP-tag  
453 jams the machine by precluding passage of PilY1.3-sfGFP and PilW3-sfGFP through the  
454 secretin channel in the OM<sup>10</sup>. sfGFP-tagged TfcP was fully active and did not localise polarly.  
455 These observations strongly support that TfcP is neither part of the T4aPM nor of the pilus.  
456 They also strengthen the hypothesis that the suggested direct interaction between PilY1.1 and  
457 TfcP is transient and occurs in the periplasm before PilY1.1 incorporation into the T4aPM (Fig.  
458 8). The observation that added calcium stabilises PilY1.1 in the absence of TfcP supports that  
459 TfcP does not act as a metallochaperone to deliver calcium to PilY1.1. Altogether, we suggest  
460 that TfcP transiently interacts with PilY1.1, thereby stimulating folding and efficient calcium  
461 binding by PilY1.1. Subsequently, PilY1.1 with bound calcium is incorporated into the priming  
462 complex of the T4aPM to support T4aP formation (Fig. 8). This mechanism of protein  
463 stabilisation is reminiscent to that of periplasmic chaperones, which in an ATP-independent  
464 manner transiently interact with their periplasmic clients to enable folding<sup>58</sup>, except that the  
465 TfcP/PilY1.1 interaction is suggested to promote calcium binding by PilY1.1, which then  
466 stabilises PilY1.1. Altogether, these findings also provide evidence for a novel cytochrome *c*  
467 function in protein folding and/or stabilisation.

468 In the presence of added calcium at 1.0 mM, more T4aP are formed and the ratio between  
469 minor pilins and PilY1.1 to PilA is increased. These observations support that calcium not only  
470 helps to stabilise PilY1.1, but may also stabilise the pilus including the minor pilin/PilY1.1 tip  
471 complex in extracellular space. In this context, it is interesting to note that calcium binding has  
472 been reported to stabilise the interactions between major pseudopilin subunits in the  
473 pseudopilus of the type II secretion system of *Klebsiella oxytoca*<sup>59</sup>. In future experiments, this  
474 effect of calcium will be addressed.

475 In addition to the conserved proteins of the T4aPM, T4aP extension in several species depends  
476 on accessory factors that are much less conserved. For instance, the c-di-GMP binding protein  
477 FimX in *P. aeruginosa* and SgmX in *M. xanthus* stimulate T4aP extension<sup>60-62</sup>. TfcP adds to be  
478 list of such regulators and also acts at the level of extension; however, in contrast to these  
479 cytoplasmic regulators, TfcP acts in the periplasm.

480



## 481 **Methods**

482 **Bacterial strains and growth media.** All *M. xanthus* strains are derivatives of DK1622<sup>63</sup> and  
483 listed in Supplementary Table 1. All plasmids are listed in Supplementary Table 2. In-frame  
484 deletion mutants were generated using double homologous recombination using a *galk*-  
485 containing plasmid<sup>64</sup>. Genes were ectopically expressed from the *pilA*-promoter in plasmids  
486 integrated by site-specific recombination at the *attB* site. All plasmids were verified by  
487 sequencing. All strains were confirmed by PCR. Oligonucleotides are listed in Supplementary  
488 Table 3. *M. xanthus* liquid cultures were grown in 1% CTT broth (1% Bacto Casitone (Gibco),  
489 10 mM Tris-HCl pH8.0, 1 mM KPO<sub>4</sub> pH7.6, 8 mM MgSO<sub>4</sub>) or on 1% CTT 1.5% agar plates.  
490 When required media were supplemented with kanamycin (50 µg ml<sup>-1</sup>) or oxytetracyclin (10 µg  
491 ml<sup>-1</sup>)<sup>65</sup>. *E. coli* strains were grown in LB broth<sup>66</sup>. Plasmids were propagated using *E. coli* NEB-  
492 Turbo.

493 **Bioinformatics.** Homologs of TfcP were searched using BlastP<sup>67</sup>. Pairwise sequence  
494 alignments were calculated using EMBOSS-Needle<sup>68</sup>. Protein domains were identified using  
495 InterPro<sup>69</sup>. Alignments of TfcP and homologs were computed using MUSCLE<sup>68</sup>. The homology  
496 model of PilY1.1 was generated using the Phyre2 server<sup>70</sup>.

497 **Motility assay.** T4aPdM was assayed as described<sup>71</sup>. Briefly, exponentially growing *M. xanthus*  
498 cultures were harvested and concentrated in 1% CTT to a density of 7×10<sup>9</sup> cells ml<sup>-1</sup>. 5 µl of the  
499 concentrated cell suspension were spotted on soft-agar CTT plates (0.5% CTT, 10 mM Tris-HCl  
500 pH 8.0, 1 mM KPO<sub>4</sub> pH 7.6, 8 mM MgSO<sub>4</sub>, 0.5% select-agar (Invitrogen)) and incubated at 32°C  
501 for 24 hrs. Colonies were imaged using a Leica MZ75 stereomicroscope equipped with a Leica  
502 MC120 HD camera.

503 **T4aP shearing assay.** T4aP were sheared off *M. xanthus* cells as described<sup>72</sup>. Briefly, cells  
504 were grown on CTT 1.5% agar plates at 32°C for three days, then scraped off, and  
505 resuspended in pili resuspension buffer (100 mM Tris-HCl pH 7.6, 150 mM NaCl) (1 ml per  
506 60 mg cells). Cell suspensions were vortexed 10 min at maximum speed. A 100 µl aliquot was  
507 harvested and resuspended in 200 µl sodium dodecyl sulfate (SDS) lysis buffer (50 mM Tris-  
508 HCl pH 6.8, 2% SDS, 10% glycerol, 0.1 M DTT, 1.5 mM EDTA, 0.001% Bromophenol Blue),  
509 and denatured at 95°C for 10 min and used to determine the cellular PilA amount. The  
510 remaining cell suspension was cleared three times by 20 min centrifugation at 20,000 *g* at 4°C.  
511 Pili in the cleared supernatant were precipitated by adding 10× pili-precipitation buffer (final  
512 concentration: 100 mM MgCl<sub>2</sub>, 2% PEG 6000, 100 mM Tris-HCl pH 7.6, 150 mM NaCl),  
513 incubation on ice for 4 hrs and centrifugation at 20,000 *g* for 30 min, 4°C. The pellet was

514 resuspended in 1  $\mu$ l SDS lysis buffer per mg cells and boiled for 10 min at 95°C. The samples  
515 were separated by SDS-PAGE and analysed for PilA accumulation by immuno-blot using PilA  
516 antibodies.

517 **Immuno-blot and peroxidase staining.** Immuno-blot analysis was carried out as described<sup>66</sup>.  
518 Samples were prepared by harvesting exponentially growing *M. xanthus* cells and subsequently  
519 resuspension in SDS lysis buffer to an equal concentration of cells. Immuno-blot was done  
520 using as primary antibodies  $\alpha$ -PilB,  $\alpha$ -PilC,  $\alpha$ -PilQ<sup>36</sup>,  $\alpha$ -PilA,  $\alpha$ -LonD<sup>10</sup>,  $\alpha$ -FLAG (Rockland; 600-  
521 401-383),  $\alpha$ -GFP (Roche; 11814460001),  $\alpha$ -MalE (New England Biolabs),  $\alpha$ -PilY1.1<sup>73</sup> and  $\alpha$ -  
522 TfcP. Antibodies against TfcP were generated by Eurogentec against TfcP $\Delta$ <sup>1-18</sup>-His<sub>6</sub> purified from  
523 *E. coli* Rosetta 2(DE3) containing plasmid pMH6 using native Ni-NTA affinity purification. As  
524 secondary antibodies, goat  $\alpha$ -rabbit immunoglobulin G peroxidase conjugate (Sigma-Aldrich,  
525 A8275) and sheep  $\alpha$ -mouse immunoglobulin G peroxidase conjugate (Amersham, NXA931)  
526 were used. Antibodies and conjugates were used in the following dilutions: 1:500  $\alpha$ -TfcP;  
527 1:1000  $\alpha$ -PilY1.1; 1:3000  $\alpha$ -PilB;  $\alpha$ -PilC; 1:5000  $\alpha$ -PilQ;  $\alpha$ -PilA; 1:6000  $\alpha$ -LonD; 1:2000  $\alpha$ -GFP,  
528  $\alpha$ -MalE,  $\alpha$ -FLAG and  $\alpha$ -mouse peroxidase conjugate; and, 1:10,000  $\alpha$ -rabbit peroxidase  
529 conjugate. Blots were developed using Luminata™Western HRP substrate (Millipore). Unless  
530 otherwise noted, protein from  $3 \times 10^8$  cells were loaded per lane. For peroxidase staining, protein  
531 was separated by SDS-PAGE, blotted on a nitrocellulose membrane and developed using  
532 Luminata™Western HRP substrate.

533 **Fractionation of *M. xanthus*.** *M. xanthus* was fractionated into fractions enriched for soluble,  
534 IM and OM proteins as described<sup>74</sup>. Briefly, an exponentially growing *M. xanthus* culture was  
535 harvested and the pellet resuspended in lysis buffer (50 mM Tris-HCl pH7.6, Protease inhibitor  
536 cocktail (Roche)) (1 ml per 80 mg cells). A 75  $\mu$ l aliquot was taken as the whole cell sample,  
537 suspended with SDS-lysis buffer and boiled 10 min at 95°C. Cells were lysed using sonication  
538 and lysates cleared by centrifugation at 8000 g for 1 min. The cleared lysate was subjected to  
539 ultra-centrifugation using an Air-Fuge (Beckman) at  $\sim 150,000$  g for 1 hr. The resulting  
540 supernatant contains soluble proteins and was mixed with SDS-lysis buffer. The pellet was  
541 resuspended in detergent-lysis buffer (50 mM Tris-HCl pH 7.6, 2% Triton X-100) and subjected  
542 to ultra-centrifugation as described. The resulting supernatant is enriched for IM proteins while  
543 the pellet is enriched for OM proteins. The supernatant was mixed with SDS lysis buffer and the  
544 pellet resuspended in SDS-lysis buffer. The samples were analysed by SDS-PAGE and  
545 immuno-blot.

546 **Fluorescence microscopy.** Exponentially growing *M. xanthus* cells were spotted on 1%  
547 agarose pads supplemented with TPM (10 mM Tris-HCl pH 8.0, 1 mM KPO<sub>4</sub> pH 7.6, 8 mM  
548 MgSO<sub>4</sub>) and incubated for 30 min at 32°C before microscopy. Cells were imaged using a Leica  
549 DMI600B microscope with a Hamamatsu Flash 4.0 camera. Images were recorded with Leica  
550 MM AF software and processed with Metamorph.

551 **Targeted proteomics.** To identify peptides of T4aPM proteins suitable for targeted-mass  
552 spectrometry (MS) analysis, we performed sample preparation on *M. xanthus* cell pellets for  
553 total proteome analysis as described<sup>10</sup>. Briefly, proteins were extracted from cell pellets by heat  
554 exposure in the presence of 2% sodium-lauroylsarcosinate. Extracts were then reduced,  
555 alkylated and digested overnight using trypsin (Promega). Peptides were purified using C18  
556 solid phase extraction and analysed on a Q-Exactive Plus mass spectrometer connected to an  
557 Ultimate 3000 RSLC and a nanospray flex ion source (all Thermo Scientific). The peptides were  
558 analysed using data dependent acquisition with settings as described<sup>10</sup>. MS raw data were  
559 searched using Mascot (Matrix Science) and loaded into Scaffold 4 (Proteome software) for  
560 further data evaluation. Peptides considered most amenable for targeted MS were chosen for  
561 reference peptide synthesis (JPT Peptide Technologies, Berlin) containing heavy labelled (<sup>13</sup>C  
562 and <sup>15</sup>N) C-terminal Lys or Arg residues with a resulting mass shift of +8 Da and +10 Da,  
563 respectively. Sequences of reference peptides are listed in Supplementary Table 4. For targeted  
564 MS experiments, reference peptides and iRT retention calibration peptides (Biognosys) were  
565 spiked into the *M. xanthus* total proteome peptide samples (generated as described), and  
566 analysed by liquid chromatography (LC)-MS.

567 Peptides were separated on a 90 min gradient from 2-50% acetonitrile at a flow rate of 300 nl  
568 min<sup>-1</sup>, and analysed by MS in targeted parallel reaction monitoring (PRM) mode. The mass  
569 spectrometer first acquired a full MS-Selected Ion Monitoring (SIM) scan with an MS1 resolution  
570 of 70,000, AGC (automatic gain control) target setting of 1e<sup>6</sup> and 100 ms max injection time.  
571 Then PRM scans were carried out with a MS2 resolution of 35,000, AGC target setting of 2e<sup>5</sup>,  
572 100 ms maximum injection time with a quadrupole isolation window of 1.6 m/z. Normalised  
573 collision energy was set to 27%. All stages of targeted MS data analysis was carried out in  
574 Skyline (20.2.1.384)<sup>75</sup>. Results with dot-product <0.85 or ratio<sub>heavy/light</sub><0.005 were excluded from  
575 the analysis.

576 **Proteome analysis of T4aP.** Label-free quantification (LFQ) MS of the pili proteome was  
577 carried out as described<sup>10</sup>. Briefly, pili were purified following the shearing assay protocol with  
578 the modification that after precipitation, pili were resuspended in pili-resuspension buffer and re-

579 precipitated with pili-precipitation buffer three times. Pili were resuspended in pili-resuspension  
580 buffer to 1  $\mu$ l buffer per 1 mg cells. 25% of the pili sample was mixed with SDS-lysis buffer and  
581 analysed by SDS-PAGE and subsequent staining with Coomassie Blue. The remaining 75%  
582 were precipitated with acetone. The dried acetone pellets were resuspended, reduced, alkylated  
583 and digested with trypsin as described<sup>10</sup>. Pili LFQ proteomics analysis was carried out on an  
584 Exploris 480 mass spectrometer (Thermo Scientific), connected to an Ultimate 3000 RSLC.  
585 Peptides were separated on a 60 min gradient from 2-50% acetonitrile at a flow rate of 300 nl  
586  $\text{min}^{-1}$ . The Exploris 480 mass spectrometer first acquired a full MS scan with an MS1 resolution  
587 of 60,000, AGC target setting of  $3e^6$  and 60 ms max injection time, followed by MS/MS scans of  
588 Top-20 most abundant signals. For MS/MS scans a resolution of 7,500 was set, with an AGC of  
589  $2e^5$  and 30 ms max. injection time. Normalised collision energy was set to 27% and the isolation  
590 window of the quadrupole was 1.6 m/z. All MS raw data was analysed by MaxQuant (1.6.17.0).  
591 iBAQ values were calculated as described<sup>10</sup> as the sum of all peptide intensities for a given  
592 protein divided by the number of theoretically MS observable peptides. Following MaxQuant  
593 analysis, the iBAQ values were normalised by the total iBAQ sum independently of the highly  
594 abundant PilA.

595 **Purification of MalE-TfcP.** For purification of MalE-TfcP/MalE-TfcP<sup>C91M</sup>, gene expression was  
596 done in *E. coli* strain BL21 containing the helper plasmid pEC86, which encodes the *ccm* genes  
597 for cytochrome *c* maturation of *E. coli*, as well as pMH31 (MalE-TfcP) or pMH39 (MalE-TfcP<sup>C91M</sup>)  
598 using auto-induction in buffered 5052-Terrific-Broth (0.5% glycerol, 0.05% glucose, 0.2%  
599 lactose, 2.4% yeast extract, 2% tryptone, 25 mM  $\text{Na}_2\text{HPO}_4$ , 25 mM  $\text{KH}_2\text{PO}_4$ , 50 mM  $\text{NH}_4\text{Cl}$ ,  
600 5 mM  $\text{Na}_2\text{SO}_4$ , 2 mM  $\text{MgSO}_4$ )<sup>76</sup> containing chloramphenicol (25  $\mu\text{g ml}^{-1}$ ) and carbenicillin  
601 (100  $\mu\text{g ml}^{-1}$ ). After 24 hrs incubation at 37°C, cells were harvested, and resuspended in MBP-  
602 lysis buffer (100 mM Tris-HCl pH 7.0, 200 mM NaCl) supplemented with EDTA-free protease  
603 inhibitor cocktail (Roche) and lysed using sonication. The lysate was cleared by centrifugation at  
604 20,000 *g*, 4°C for 30 minutes and loaded onto a 5 ml HighTrap MBP column (GE Healthcare)  
605 using an Äkta-Pure system (GE Healthcare). The column was washed with lysis buffer and  
606 protein eluted with 10 column volumes MBP-elution buffer (100 mM Tris-HCl pH 7.0, 200 mM  
607 NaCl, 10 mM maltose). The elution fractions containing MalE-TfcP/MalE-TfcP<sup>C91M</sup> were pooled  
608 and diluted four fold in 100 mM Tris-HCl pH 7.0. The pooled and diluted samples were loaded  
609 onto a HighTrap SP ion exchange column. The column was washed with IEX-wash buffer  
610 (100 mM Tris-HCl pH 7.0) and protein eluted in a linear gradient with IEX-elution buffer (100 mM  
611 Tris-HCl pH 7.0, 2 M NaCl). Samples were concentrated using an Amicon Ultra filter with  
612 10 kDa cutoff and loaded on a HiLoad 16/600 Superdex 200 pg (GE Healthcare) size exclusion

613 chromatography column equilibrated with SEC-buffer (50 mM Tris-HCl pH 7.6, 50 mM NaCl).  
614 Protein was either used fresh or snap-frozen in buffer containing SEC-buffer with 10% glycerol.

615 **UV-Vis spectroscopy.** UV-Vis measurements of purified (oxidised) and reduced MalE-  
616 TfcP/MalE-TfcP<sup>C91M</sup> was conducted on a Tecan M200Pro platereader or a Shimadzu 1900  
617 spectrophotometer. Protein was diluted to an absorbance of ~0.7. After measurement of the  
618 oxidised spectrum, protein was reduced by adding a few crystals of sodium-dithionite,  
619 equilibrated for 15 min and the reduced spectrum recorded.

620 **Redox titrations.** Redox titrations were carried out in a Coy anaerobic tent (3% H<sub>2</sub>, <5 ppm O<sub>2</sub>).  
621 MalE-TfcP in HEPES buffer, pH 7.0, was mixed with 20 μM (final concentration) of the following  
622 redox mediators: Phenosafranin, safranin T, neutral red, benzyl viologen, and methyl viologen.  
623 The solution potential was measured with an InLab redox micro combination electrode (Mettler  
624 Toledo) under anaerobic conditions. Correction to redox potentials vs. H<sub>2</sub>/H<sup>+</sup> was done by  
625 addition of 207 mV to the reading of the potentiometer. Stirring was done using a 8 mm teflon  
626 coated stirrer bar. For redox titration using visible spectroscopy (using a Shimadzu 1900  
627 spectrophotometer), automated addition of 15 μl buffered 0.2 mM sodium-dithionite solution was  
628 done using a remotely controlled peristaltic pump (Pharmacia P1) for 60 sec followed by 2 min  
629 equilibration and 2 min recording of the spectra in the 600-460 nm range. The normalised  
630 absorbance increase at 550 nm (corrected by the absorbance for titration of mediators only)  
631 was fitted to the Nernst equation for n=1 at 298 K. For the EPR titration, manual addition of  
632 aliquots of buffered sodium-dithionite was used. After stabilisation of the solution potential,  
633 300 μl samples were withdrawn, transferred to EPR tubes, which were capped with rubber  
634 tubing and an acrylic glass stick. Samples were shock-frozen and stored in liquid nitrogen until  
635 the EPR measurements.

636 **EPR spectroscopy.** EPR spectra were recorded with an X-band EPR spectrometer (Bruker  
637 Elexsys E580) in a 4122HQE-W1/1017 resonator. The temperature of the samples in Ilmasil PN  
638 quartz tubes (4.7±0.2 mm outer diameter, 0.45±0.05 mm wall thickness) was maintained at 12 K  
639 with an ESR900 continuous flow helium cryostat (Oxford Instruments). The modulation  
640 frequency was 100 kHz and the modulation amplitude 1.5 mT. Spectra were averages for four  
641 90 sec scans. For the titration, the normalised amplitude of the derivative-shaped feature of the  
642 low spin EPR signal of the ferric state at g=2.26 was used for a fit to the Nernst equation (n=1,  
643 T=298 K).

644 **Operon mapping.** Total RNA was isolated from exponentially growing *M. xanthus* cultures  
645 using the Monarch Total RNA Miniprep Kit (NEB).  $10^9$  cells were harvested and resuspended in  
646 200  $\mu$ l lysis-buffer (100 mM Tris-HCl pH 7.6, 1 mg ml<sup>-1</sup> lysozyme). After incubation at 25°C for  
647 5 min cells were lysed and RNA purified according to manufacturer's protocol with the exception  
648 that the on-column DNase treatment was omitted. RNA was eluted in RNase-free water and  
649 subsequently treated with Turbo DNase and purified using the Monarch RNA Cleanup Kit  
650 (50  $\mu$ g) (NEB) and eluted in RNase-free water. 1  $\mu$ g of RNA was used for cDNA synthesis using  
651 the LunaScript RT SuperMix Kit (NEB) with and without reverse transcriptase (RT). cDNA was  
652 diluted 1:5 with water and 1  $\mu$ l of diluted cDNA used for PCR reactions.

653 **qRT-PCR.** For qRT-PCR RNA was isolated and cDNA synthesised as described for operon  
654 mapping. qPCRs were carried out using the Luna Universal qPCR MasterMix (NEB) with the  
655 primers listed in Supplementary Table 3 and measured on an Applied Biosystems 7500 Real-  
656 Time PCR system. Relative gene expression levels were calculated using the comparative C<sub>T</sub>  
657 method<sup>77</sup>. *Mxan\_3298 (tuf2)*, which encodes elongation factor Tu, and *mxan\_3303 (rpsS)*,  
658 which encodes the small ribosomal subunit protein S19, were used as internal controls. All  
659 experiments were done with three biological replicates and two technical replicates.

660 **Statistics and reproducibility.** Data shown for operon mapping, T4aP-dependent motility,  
661 T4aP shearing assays, immuno-blot experiments, UV-Vis spectroscopy and fluorescence  
662 microscopy were obtained in at least two biological replicates with similar results. For targeted  
663 proteomics and LFQ-analysis of the pili proteome, four biological replicates were analysed.  
664 qRT-PCR analysis were conducted with three biological replicates each with two technical  
665 replicates. Redox titrations and EPR-spectroscopy were done in a single experiment.

666 **Data availability.** Source data are provided with this paper. The authors declare that all data  
667 supporting this study are available within the article, its Supplementary Information file, and the  
668 Source Data file.

669

## 670 References

- 671 1 Harshey, R. M. Bacterial motility on a surface: many ways to a common goal. *Annu. Rev*  
672 *Microbiol.* **57**, 249-273 (2003).
- 673 2 Burrows, L. L. *Pseudomonas aeruginosa* twitching motility: type IV pili in action. *Annu.*  
674 *Rev. Microbiol.* **66**, 493-520 (2012).
- 675 3 Evans, K. J., Lambert, C. & Sockett, R. E. Predation by *Bdellovibrio bacteriovorus* HD100  
676 requires type IV pili. *J. Bacteriol.* **189**, 4850-4859 (2007).
- 677 4 Craig, L., Forest, K. T. & Maier, B. Type IV pili: dynamics, biophysics and functional  
678 consequences. *Nat. Rev. Microbiol.* **17**, 429-440 (2019).
- 679 5 Merz, A. J., So, M. & Sheetz, M. P. Pilus retraction powers bacterial twitching motility.  
680 *Nature* **407**, 98-102 (2000).
- 681 6 Skerker, J. M. & Berg, H. C. Direct observation of extension and retraction of type IV pili.  
682 *Proc Natl Acad Sci U S A* **98**, 6901-6904 (2001).
- 683 7 Clausen, M., Jakovljevic, V., Sogaard-Andersen, L. & Maier, B. High force generation is a  
684 conserved property of type IV pilus systems. *J. Bacteriol.* **191**, 4633-4638 (2009).
- 685 8 Chang, Y. W. *et al.* Architecture of the type IVa pilus machine. *Science* **351**, aad2001  
686 (2016).
- 687 9 Gold, V. A., Salzer, R., Averhoff, B. & Kühlbrandt, W. Structure of a type IV pilus machinery  
688 in the open and closed state. *eLife* **4**, e07380 (2015).
- 689 10 Treuner-Lange, A. *et al.* PilY1 and minor pilins form a complex priming the type IVa pilus  
690 in *Myxococcus xanthus*. *Nat. Comm.* **11**, 5054 (2020).
- 691 11 McCallum, M., Tammam, S., Khan, A., Burrows, L. L. & Howell, P. L. The molecular  
692 mechanism of the type IVa pilus motors. *Nat. Comm.* **8**, 15091 (2017).
- 693 12 Jakovljevic, V., Leonardy, S., Hoppert, M. & Sogaard-Andersen, L. PilB and PilT are  
694 ATPases acting antagonistically in type IV pilus function in *Myxococcus xanthus*. *J.*  
695 *Bacteriol.* **190**, 2411-2421 (2008).
- 696 13 Mancl, J. M., Black, W. P., Robinson, H., Yang, Z. & Schubot, F. D. Crystal structure of a  
697 type IV pilus assembly ATPase: Insights into the molecular mechanism of PilB from  
698 *Thermus thermophilus*. *Structure* **24**, 1886-1897 (2016).
- 699 14 Nguyen, Y. *et al.* *Pseudomonas aeruginosa* minor pilins prime type IVa pilus assembly  
700 and promote surface display of the PilY1 adhesin. *J. Biol. Chem.* **290**, 601-611 (2015).
- 701 15 Misic, A. M., Satyshur, K. A. & Forest, K. T. *P. aeruginosa* PilT structures with and without  
702 nucleotide reveal a dynamic type IV pilus retraction motor. *J. Mol. Biol.* **400**, 1011-1021  
703 (2010).
- 704 16 Rudel, T., Scheurerpflug, I. & Meyer, T. F. *Neisseria* PilC protein identified as type-4 pilus  
705 tip-located adhesin. *Nature* **373**, 357-359 (1995).
- 706 17 Johnson, M. D. *et al.* *Pseudomonas aeruginosa* PilY1 binds integrin in an RGD- and  
707 calcium-dependent manner. *PLOS One* **6**, e29629 (2011).
- 708 18 Marko, V. A., Kilmury, S. L. N., MacNeil, L. T. & Burrows, L. L. *Pseudomonas aeruginosa*  
709 type IV minor pilins and PilY1 regulate virulence by modulating FimS-AlgR activity. *PLoS*  
710 *Pathogens* **14**, e1007074 (2018).
- 711 19 Kuchma, S. L. *et al.* Cyclic-di-GMP-mediated repression of swarming motility by  
712 *Pseudomonas aeruginosa*: the *pilY1* gene and its impact on surface-associated  
713 behaviors. *J. Bacteriol.* **192**, 2950-2964 (2010).
- 714 20 Pelicic, V. Type IV pili: e pluribus unum? *Mol. Microbiol.* **68**, 827-837 (2008).
- 715 21 Zollner, R., Cronenberg, T. & Maier, B. Motor properties of PilT-independent type 4 pilus  
716 retraction in *Gonococci*. *J. Bacteriol.* **201** (2019).
- 717 22 Feng, T. *et al.* Interspecies and intraspecies signals synergistically regulate *Lysobacter*  
718 *enzymogenes* twitching motility. *Appl. Env. Microbiol.* **85** (2019).

- 719 23 Cruz, L. F., Parker, J. K., Cobine, P. A. & De La Fuente, L. Calcium-enhanced twitching  
720 motility in *Xylella fastidiosa* is linked to a single PilY1 homolog. *App. Env. Microbiol.* **80**,  
721 7176-7185 (2014).
- 722 24 Engel, C. E. A., Vorlander, D., Biedendieck, R., Krull, R. & Dohnt, K. Quantification of  
723 microaerobic growth of *Geobacter sulfurreducens*. *PLoS One* **15**, e0215341 (2020).
- 724 25 Parker, J. K., Cruz, L. F., Evans, M. R. & De La Fuente, L. Presence of calcium-binding  
725 motifs in PilY1 homologs correlates with Ca-mediated twitching motility and evolutionary  
726 history across diverse bacteria. *FEMS Microbiol. Lett.* **362** (2015).
- 727 26 Giltner, C. L., Nguyen, Y. & Burrows, L. L. Type IV pilin proteins: versatile molecular  
728 modules. *Microbiol. Mol. Biol. Rev.* **76**, 740-772 (2012).
- 729 27 Orans, J. *et al.* Crystal structure analysis reveals *Pseudomonas* PilY1 as an essential  
730 calcium-dependent regulator of bacterial surface motility. *Proc. Natl. Acad. Sci. U S A* **107**,  
731 1065-1070 (2010).
- 732 28 Hoppe, J. *et al.* PilY1 promotes *Legionella pneumophila* infection of human lung tissue  
733 explants and contributes to bacterial adhesion, host cell invasion, and twitching motility.  
734 *Front. Cell. Infect. Microbiol.* **7**, 63 (2017).
- 735 29 Zhang, Y., Ducret, A., Shaevitz, J. & Mignot, T. From individual cell motility to collective  
736 behaviors: insights from a prokaryote, *Myxococcus xanthus*. *FEMS Microbiol. Rev.* **36**,  
737 149-164 (2012).
- 738 30 Schumacher, D. & Søgaard-Andersen, L. Regulation of cell polarity in motility and cell  
739 division in *Myxococcus xanthus*. *Annu. Rev. Microbiol.* **71**, 61-78 (2017).
- 740 31 Zaidi, S., Hassan, M. I., Islam, A. & Ahmad, F. The role of key residues in structure,  
741 function, and stability of cytochrome-c. *Cell. Mol. Life Sci.* **71**, 229-255 (2014).
- 742 32 Thöny-Meyer, L. Cytochrome c maturation: a complex pathway for a simple task?  
743 *Biochem. Soc. Trans.* **30**, 633-638 (2002).
- 744 33 Ambler, R. P. Sequence variability in bacterial cytochromes c. *Biochim Biophys Acta* **1058**,  
745 42-47 (1991).
- 746 34 Fufezan, C., Zhang, J. & Gunner, M. R. Ligand preference and orientation in b- and c-type  
747 heme-binding proteins. *Proteins: Structure, Function, and Bioinformatics* **73**, 690-704  
748 (2008).
- 749 35 Zuccarello, L. *et al.* Protonation of the Cysteine axial ligand investigated in His/Cys c-type  
750 cytochrome by UV-Vis and Mid- and Far-IR spectroscopy. *J. Phys. Chem. Lett.* **11**, 4198-  
751 4205 (2020).
- 752 36 Bulyha, I. *et al.* Regulation of the type IV pili molecular machine by dynamic localization  
753 of two motor proteins. *Mol. Microbiol.* **74**, 691-706 (2009).
- 754 37 Friedrich, C., Bulyha, I. & Søgaard-Andersen, L. Outside-in assembly pathway of the type  
755 IV pilus system in *Myxococcus xanthus*. *J. Bacteriol.* **196**, 378-390 (2014).
- 756 38 Nudleman, E., Wall, D. & Kaiser, D. Polar assembly of the type IV pilus secretin in  
757 *Myxococcus xanthus*. *Mol. Microbiol.* **60**, 16-29 (2006).
- 758 39 Londer, Y. Y. in *Heterologous gene expression in E. coli: Methods and protocols* Vol. 705  
759 123-150 (Humana Press, 2011).
- 760 40 Poulos, T. L. Heme enzyme structure and function. *Chem. Rev.* **114**, 3919-3962 (2014).
- 761 41 Raphael, A. L. & Gray, H. B. Axial ligand replacement in horse heart cytochrome c by  
762 semisynthesis. *Proteins* **6**, 338-340 (1989).
- 763 42 Raphael, A. L. & Gray, H. B. Semisynthesis of axial-ligand (position 80) mutants of  
764 cytochrome c. *J. Am. Chem. Soc.* **113**, 1038-1040 (2002).
- 765 43 Smith, A. T. *et al.* Identification of Cys 94 as the distal ligand to the Fe (III) heme in the  
766 transcriptional regulator RcoM-2 from *Burkholderia xenovorans*. *J. Biol. Inorg. Chem.* **17**,  
767 1071-1082 (2012).



- 768 44 Cheesman, M. R., Little, P. J. & Berks, B. C. Novel heme ligation in a c-type cytochrome  
769 involved in thiosulfate oxidation: EPR and MCD of SoxAX from *Rhodovulum sulfidophilum*.  
770 *Biochemistry* **40**, 10562-10569 (2001).
- 771 45 Reijerse, E. J. *et al.* The unusual redox centers of SoxXA, a novel c-type heme-enzyme  
772 essential for chemotrophic sulfur-oxidation of *Paracoccus pantotrophus*. *Biochemistry* **46**,  
773 7804-7810 (2007).
- 774 46 Cheng, Y. *et al.* Mutation of the conserved calcium-binding motif in *Neisseria gonorrhoeae*  
775 PilC1 impacts adhesion but not piliation. *Infect. Imm.* **81**, 4280-4289 (2013).
- 776 47 Porsch, E. A. *et al.* Calcium binding properties of the *Kingella kingae* PilC1 and PilC2  
777 proteins have differential effects on type IV pilus-mediated adherence and twitching  
778 motility. *J. Bacteriol.* **195**, 886-895 (2013).
- 779 48 Kuner, J. M. & Kaiser, D. Fruiting body morphogenesis in submerged cultures of  
780 *Myxococcus xanthus*. *J Bacteriol* **151**, 458-461 (1982).
- 781 49 Sun, M., Wartel, M., Cascales, E., Shaevitz, J. W. & Mignot, T. Motor-driven intracellular  
782 transport powers bacterial gliding motility. *Proc. Natl. Acad. Sci. U S A* **108**, 7559-7564  
783 (2011).
- 784 50 Nan, B. *et al.* Myxobacteria gliding motility requires cytoskeleton rotation powered by  
785 proton motive force. *Proc. Natl. Acad. Sci. U S A* **108**, 2498-2503 (2011).
- 786 51 Bilecen, K. & Yildiz, F. H. Identification of a calcium-controlled negative regulatory system  
787 affecting *Vibrio cholerae* biofilm formation. *Env. Microbiol.* **11**, 2015-2029 (2009).
- 788 52 McLaughlin, S. B. & Wimmer, R. Tansley Review No. 104. Calcium physiology and  
789 terrestrial ecosystem processes. *New Phytol.* **142**, 373-417 (1999).
- 790 53 Goldman, B., Bhat, S. & Shimkets, L. J. Genome evolution and the emergence of fruiting  
791 body development in *Myxococcus xanthus*. *PLoS One* **2**, e1329 (2007).
- 792 54 Kracke, F., Vassilev, I. & Krömer, J. O. Microbial electron transport and energy  
793 conservation—the foundation for optimizing bioelectrochemical systems. *Front. Microbiol.*  
794 **6**, 575 (2015).
- 795 55 Edwards, M. J., White, G. F., Butt, J. N., Richardson, D. J. & Clarke, T. A. The crystal  
796 structure of a biological insulated transmembrane molecular wire. *Cell* **181**, 665-673 e610  
797 (2020).
- 798 56 Grein, F. *et al.* DsrJ, an essential part of the DsrMKJOP transmembrane complex in the  
799 purple sulfur bacterium *Allochromatium vinosum*, is an unusual triheme cytochrome c.  
800 *Biochemistry* **49**, 8290-8299 (2010).
- 801 57 Shimizu, T. Binding of cysteine thiolate to the Fe(III) heme complex is critical for the  
802 function of heme sensor proteins. *J. Inorg. Biochem.* **108**, 171-177 (2012).
- 803 58 Goemans, C., Denoncin, K. & Collet, J. F. Folding mechanisms of periplasmic proteins.  
804 *Biochim. Biophys. Acta* **1843**, 1517-1528 (2014).
- 805 59 López-Castilla, A. *et al.* Structure of the calcium-dependent type 2 secretion pseudopilus.  
806 *Nat. Microbiol.* **2**, 1686-1695 (2017).
- 807 60 Jain, R., Sliusarenko, O. & Kazmierczak, B. I. Interaction of the cyclic-di-GMP binding  
808 protein FimX and the Type 4 pilus assembly ATPase promotes pilus assembly. *PLOS*  
809 *Pathogens* **13**, e1006594 (2017).
- 810 61 Potapova, A., Carreira, L. A. M. & Søggaard-Andersen, L. The small GTPase MglA together  
811 with the TPR domain protein SgmX stimulates type IV pili formation in *M. xanthus*. *Proc.*  
812 *Natl. Acad. Sci. U S A* **117**, 23859-23868 (2020).
- 813 62 Mercier, R. *et al.* The polar Ras-like GTPase MglA activates type IV pilus via SgmX to  
814 enable twitching motility in *Myxococcus xanthus*. *Proc. Natl. Acad. Sci. U S A* **117**, 28366-  
815 28373 (2020).
- 816 63 Kaiser, D. Social gliding is correlated with the presence of pili in *Myxococcus xanthus*.  
817 *Proc. Natl. Acad. Sci. U S A* **76**, 5952-5956 (1979).

818 64 Shi, X. *et al.* Bioinformatics and experimental analysis of proteins of two-component  
819 systems in *Myxococcus xanthus*. *J. Bacteriol.* **190**, 613-624 (2008).  
820 65 Søgaard-Andersen, L., Slack, F. J., Kimsey, H. & Kaiser, D. Intercellular C-signaling in  
821 *Myxococcus xanthus* involves a branched signal transduction pathway. *Genes Dev.* **10**,  
822 740-754 (1996).  
823 66 Sambrook, J., Fritsch, E. F. & Maniatis, T. *Molecular Cloning: A Laboratory Manual*. (Cold  
824 Spring Harbor Laboratory Press), (1989).  
825 67 Altschul, S. F., Gish, W., Miller, W., Myers, E. W. & Lipman, D. J. Basic local alignment  
826 search tool. *J. Mol. Biol.* **215**, 403-410 (1990).  
827 68 Madeira, F. *et al.* The EMBL-EBI search and sequence analysis tools APIs in 2019. *Nucl.*  
828 *Acids Res.* **47**, W636-W641 (2019).  
829 69 Blum, M. *et al.* The InterPro protein families and domains database: 20 years on. *Nucl.*  
830 *Acids Res.* **49**, D344-D354 (2021).  
831 70 Kelley, L. A., Mezulis, S., Yates, C. M., Wass, M. N. & Sternberg, M. J. The Phyre2 web  
832 portal for protein modeling, prediction and analysis. *Nat. Protoc.* **10**, 845-858 (2015).  
833 71 Shi, W. & Zusman, D. R. The two motility systems of *Myxococcus xanthus* show different  
834 selective advantages on various surfaces. *Proc Natl Acad Sci U S A* **90**, 3378-3382 (1993).  
835 72 Wu, S. S., Wu, J. & Kaiser, D. The *Myxococcus xanthus pilT* locus is required for social  
836 gliding motility although pili are still produced. *Mol. Microbiol.* **23**, 109-121 (1997).  
837 73 Agrawal, S. Identification and characterization of novel factors needed for two aspects of  
838 *Myxococcus xanthus* physiology: Social motility and osmoregulation. PhD thesis, Johns  
839 Hopkins University, (2013).  
840 74 Thomasson, B. *et al.* MglA, a small GTPase, interacts with a tyrosine kinase to control  
841 type IV pili-mediated motility and development of *Myxococcus xanthus*. *Mol. Microbiol.* **46**,  
842 1399-1413 (2002).  
843 75 MacLean, B. *et al.* Skyline: an open source document editor for creating and analyzing  
844 targeted proteomics experiments. *Bioinformatics* **26**, 966-968 (2010).  
845 76 Studier, F. W. Stable expression clones and auto-induction for protein production in *E.*  
846 *coli*. *Methods Mol. Biol.* **1091**, 17-32 (2014).  
847 77 Schmittgen, T. D. & Livak, K. J. Analyzing real-time PCR data by the comparative CT  
848 method. *Nat. Protoc.* **3**, 1101-1108 (2008).  
849  
850

851 **Acknowledgements.** We thank Steffi Lindow for excellent help with plasmid and strain  
852 constructions, Bazlur Rashid for help with preparation of the EPR samples, and Seigo Shima as  
853 well as Rolf Thauer for many helpful discussions.

854  
855 **Funding.** This work was supported by the National Institutes of Health grant GM85024 (to EH)  
856 and the Max Planck Society (to LSA).

857  
858 **Authors' contributions.** MH: Designed and conceived the study and performed most of the  
859 experiments. ATL: Conceived the study, supervised research and provided strains and  
860 plasmids. TG: Performed targeted and label-free mass spectrometry-based quantitative  
861 proteomics. NW: Helped with the *in vitro* analyses of MalE-TfcP. EH: Generated the PilY1.1  
862 antibodies. AJP: Conceived and supervised the *in vitro* analyses of MalE-TfcP. LSA: Conceived  
863 the study, supervised research and provided funding. MH, ATL, TG, AJP and LSA: Analysed  
864 and interpreted data and wrote the manuscript.

865 All authors approved the final manuscript.

866

867 **Competing interests.** The authors declare no competing interests.

868

869

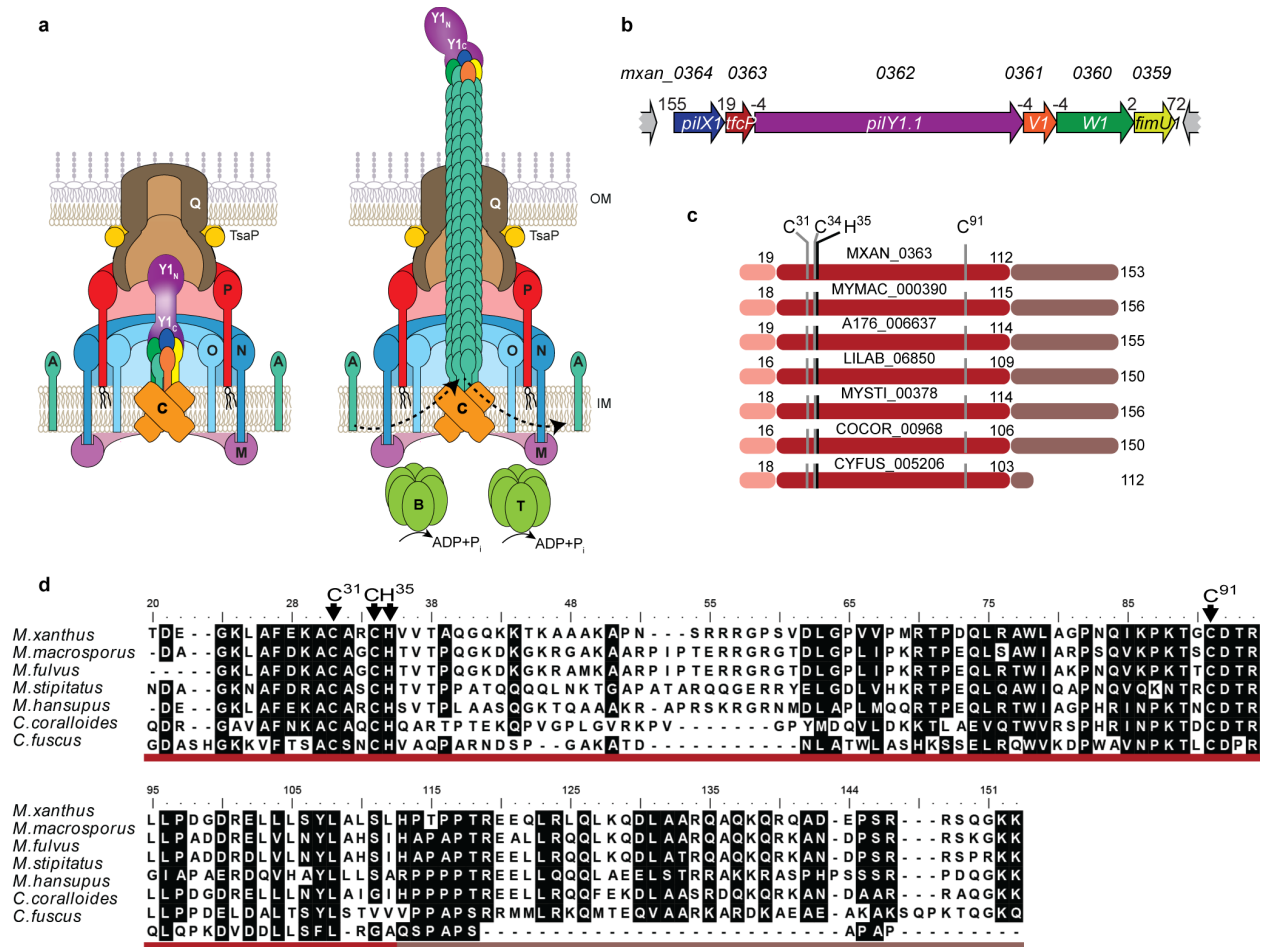

870  
871

## 872 Figure 1. TfcP is a non-canonical cytochrome c

873 **a** Architectural model of non-piliated and pilated T4aPM. PilB and PilT associate with PilC in a  
874 mutually exclusive manner during extension and retraction, respectively. Bent arrows,  
875 incorporation and removal of the major pilin PilA from the pilus base during extension and  
876 retraction, respectively. Proteins labelled with single letters have the Pil prefix. Y1<sub>N</sub> and Y1<sub>C</sub>  
877 indicate the N- and C-terminal domains of PilY1, respectively. The colour code for the four minor  
878 pilins is as in **b**. **b** Genetic organisation of cluster\_1 encoding minor pilins, PilY1.1 and TfcP.

879 Locus tags are included above and gene names within genes. Distances between start and stop  
880 codons are shown above. **c** Domain architecture of TfcP and homologs. Pink: Type I signal  
881 peptide, red: Cytochrome c domain, and brown: C-terminal extension. The cytochrome c  
882 signature motif CxxCH and the distal Cys<sup>91</sup> residue are indicated. Numbering of amino acids is  
883 according to the unprocessed, full-length protein.

884 **d** Sequence alignment of TfcP and homologs. Residues are highlighted based on >80%  
885 similarity. Domains are indicated using the color code from **c**. The cytochrome c signature motif  
886 CxxCH and the distal Cys<sup>91</sup> residue are indicated. Numbering of amino acids is according to the  
887 unprocessed, full-length protein.

888

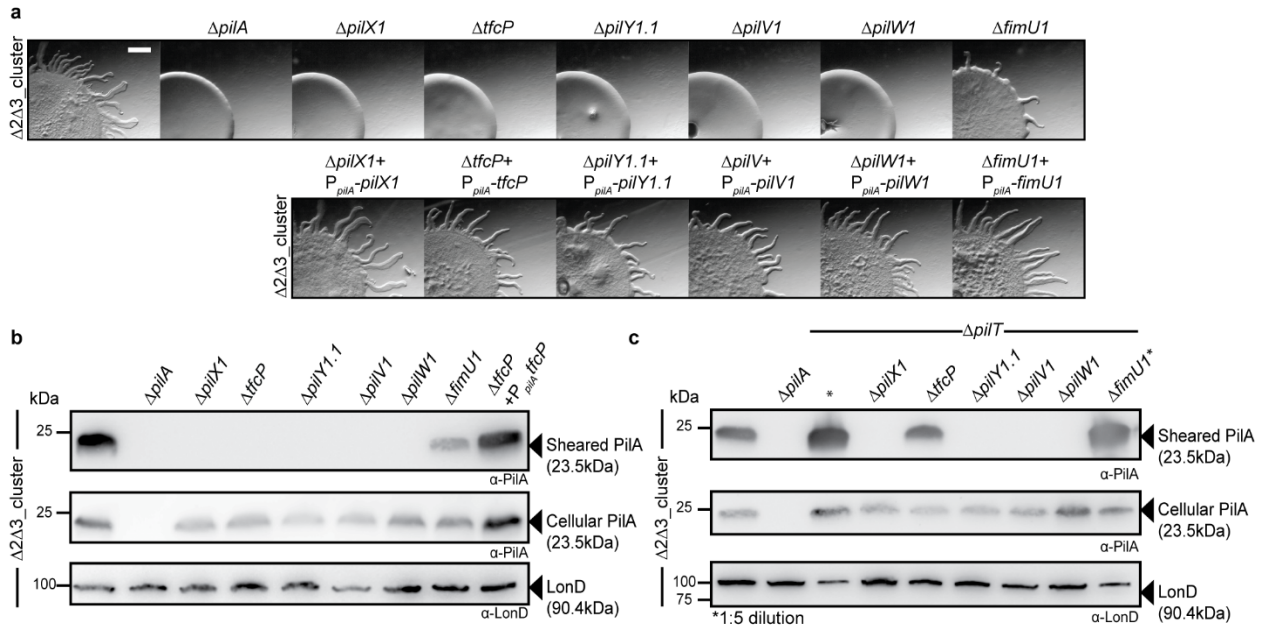

889  
890

891 **Figure 2. TfcP, minor pilins and PilY1.1 of cluster\_1 are important for T4aPdM and T4aP**  
892 **formation**

893 **a** Assay for T4aPdM. WT $_{\Delta 2\Delta 3}$  and strains with deletions of individual cluster\_1 genes, and the  
894 corresponding complementation strains were spotted on 0.5% agar supplemented with 0.5%  
895 CTT and imaged after 24 hrs. Scale bar, 1 mm. **b** Shearing assay for T4aP formation. T4aP  
896 sheared off from ~15 mg cells grown on 1.5% agar supplemented with 1.0% CTT were  
897 separated by SDS-PAGE and probed with  $\alpha$ -PilA antibodies (top panel). Middle panel, 40  $\mu$ g of  
898 protein from total cell extracts separated by SDS-PAGE and probed with  $\alpha$ -PilA antibodies and,  
899 after stripping, with  $\alpha$ -LonD antibodies as a loading control (lower panel). **c** Shearing assay for  
900 T4aP formation in retraction deficient strains. T4aP-formation was assayed as in **b**. In lanes  
901 labeled with \*, five-fold less protein was loaded.  
902

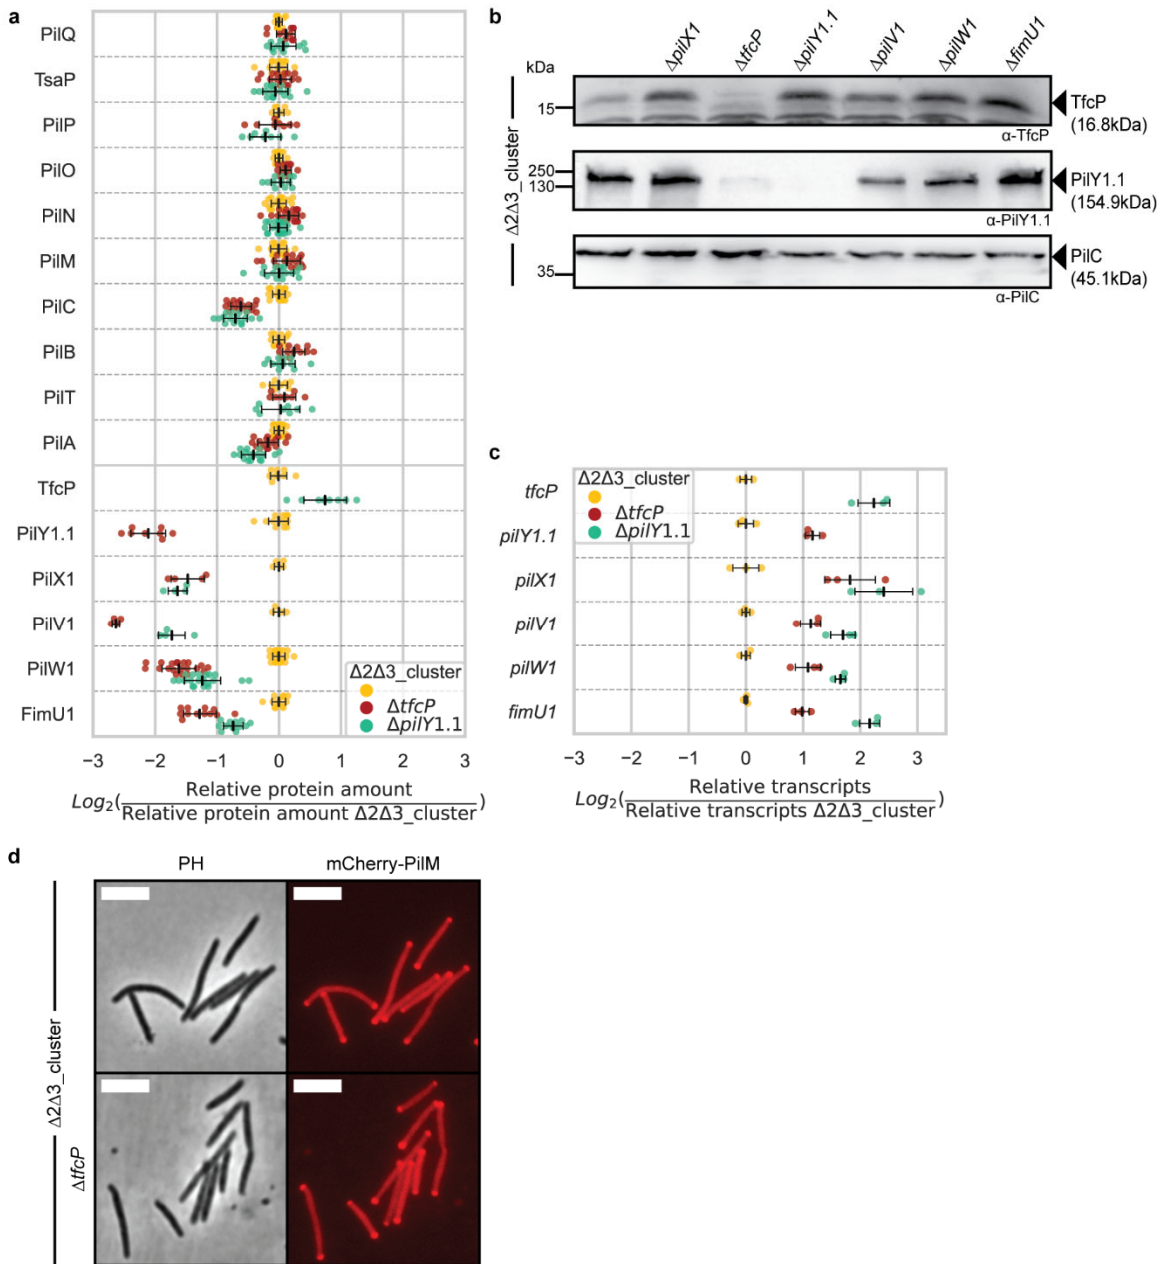

903  
904

**Figure 3. TfcP is important for stability of PilY1.1 and minor pilins of cluster\_1.**  
**a** Accumulation of proteins of the T4aPM and cluster\_1. Cells were grown in 1.0% CTT suspension culture. Relative protein amounts were determined using targeted proteomics with one to five heavy labelled reference peptides for each protein spiked into the trypsin-digested cell lysates (Methods). To calculate relative protein amounts, the light-to-heavy intensity ratio of the endogenous (light) and reference (heavy) peptide was calculated. For every strain, four biological replicates were analysed. Individual data points represent the  $log_2$  ratio of the relative amount of one peptide in one biological replicate to the mean relative amount of the same peptide in the WT $_{\Delta 2\Delta 3}$  strain (calculated from the four biological replicates). Center marker and error bars in black: Mean and standard deviation (STDEV) of all values for one protein. **b**

915 Immuno-blot analysis of TfcP and PilY1.1 accumulation. Cells were grown in 1.0% CTT  
916 suspension culture. Total cell extracts from the same number of cells were separated by SDS-  
917 PAGE and analysed by immuno-blotting. PilC was used as loading control. **c** qRT-PCR analysis  
918 of transcript levels of cluster\_1 genes. Total RNA was isolated from cells grown in 1.0% CTT  
919 suspension culture. Individual data points represent three biological replicates with each two  
920 technical replicates, and in which the ratio of the relative transcript level in a mutant over the  
921 transcript level in the WT<sub>Δ2Δ3</sub> strain is plotted. Center marker and error bars: Mean and STDEV.  
922 **d** Localisation of mCherry-PilM in the *ΔtfcP* strain. Cells were grown in 1.0% CTT suspension  
923 culture, placed on 1.0% agarose supplemented with TPM, and immediately imaged by phase  
924 contrast (PH) and fluorescence microscopy. Scale bar, 5 μm.  
925

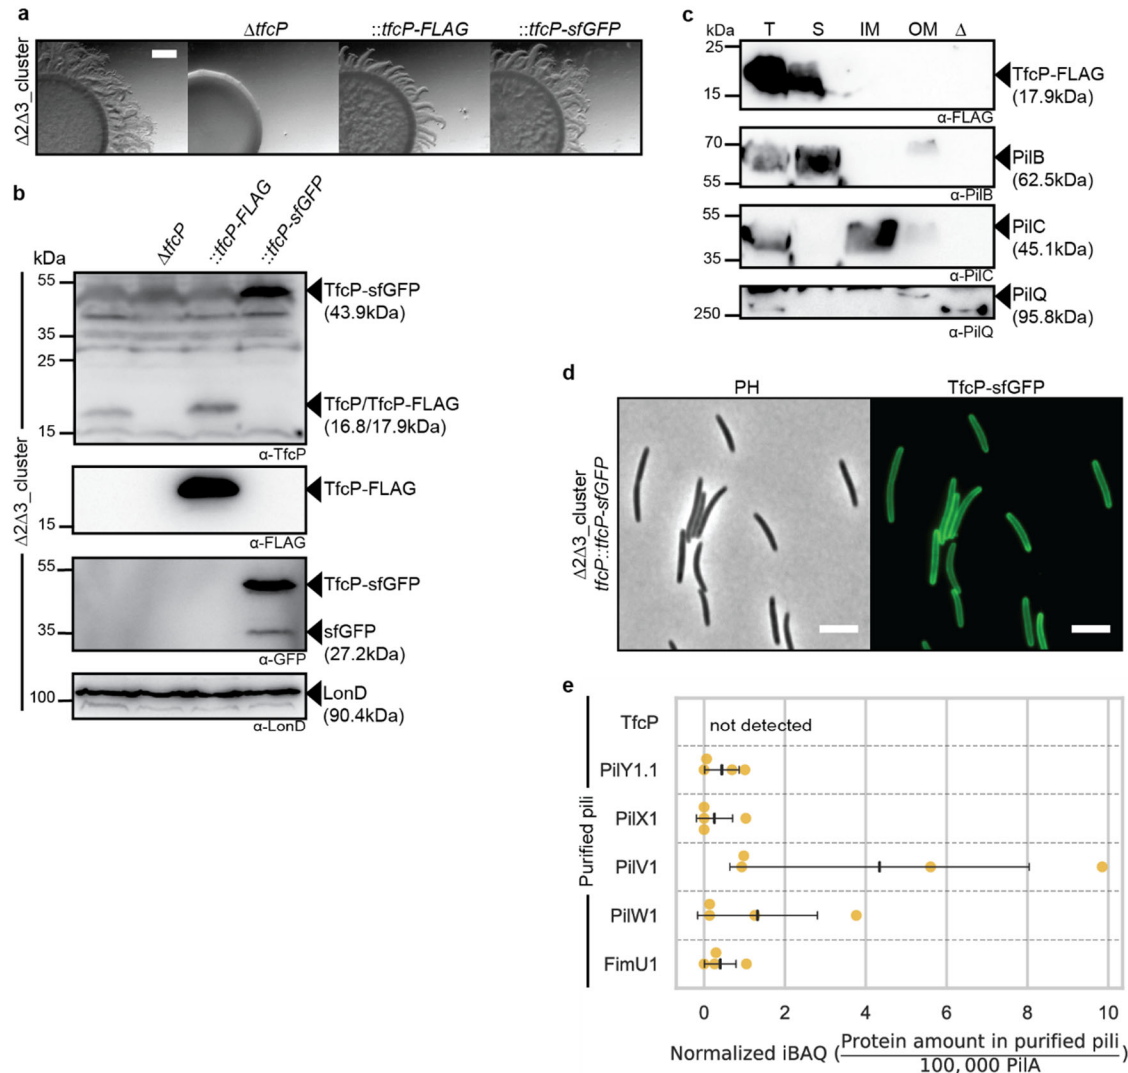

926  
927

**Figure 4. TfcP is a periplasmic protein.**

928  
929  
930  
931  
932  
933  
934  
935  
936  
937  
938  
939  
940  
941

**a** Assay for T4aPdM. Strains were assayed as in Fig. 2a. Scale bar, 1 mm. **b** Immuno-blot analysis of TfcP-FLAG and TfcP-sfGFP accumulation. Cells were grown in 1.0% CTT suspension culture and analysed as in Fig. 3b. **c** Subcellular localisation of TfcP-FLAG. Cells were grown in 1.0% CTT suspension culture and fractionated into fractions enriched for soluble proteins (S), IM proteins (IM) and OM proteins (OM). T indicates total cell extract. In the lane marked  $\Delta$ , total cell extract of the  $\Delta pilBTCMNOPQ$  mutant was used as negative control. Protein from the same number of cells was loaded per lane, and analysed by immuno-blotting. PilB, PilC and PilQ serve as controls for the fractionation and localise to the cytoplasm, IM and OM, respectively<sup>12,36</sup>. **d** Determination of TfcP-sfGFP localisation. Cells were grown in 1.0% CTT suspension culture, and analysed as in Fig. 3d. Scale bar, 5  $\mu$ m. **e** Label-free quantification (LFQ) of cluster\_1 proteins in purified pili. Pili were isolated from cells grown on 1.5% agar supplemented with 1.0% CTT. Normalised iBAQ (intensity based absolute quantification) values (Methods) were determined in four biological replicates for WT $_{\Delta 2\Delta 3}\Delta pilT$  and the negative control WT $_{\Delta 2\Delta 3}\Delta pilT\Delta pilB$ . iBAQ values of WT $_{\Delta 2\Delta 3}\Delta pilT$  were background corrected by subtraction of the



942 mean iBAQ value of the four replicates of the negative control and rescaled to the iBAQ value of  
943 100,000 PilA molecules in the same sample. Center marker and error bars: Mean and STDEV.  
944

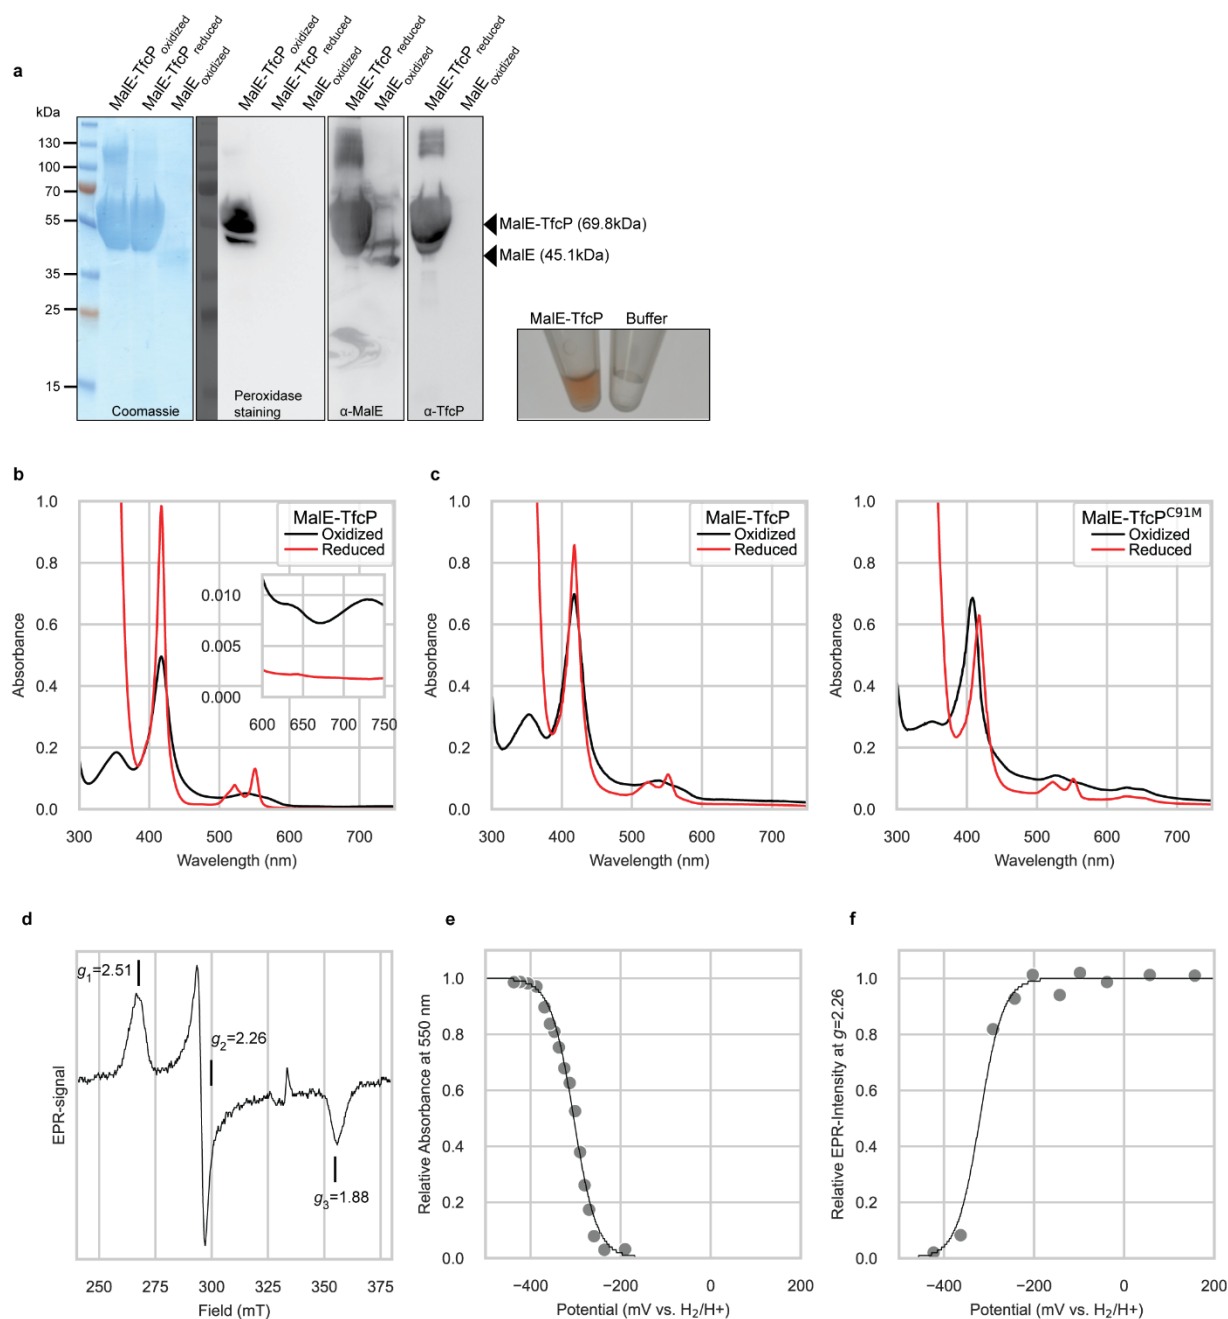

945  
946  
947  
948  
949  
950  
951  
952  
953  
954  
955

**Figure 5. TfcP is a redox active, heme-binding protein.**

**a** TfcP heme-binding assay. Panels from left-to-right, MalE-TfcP in oxidised (as purified) and reduced state (after addition of DTT) stained with Coomassie Blue, analysed for heme-binding by peroxidase staining using a luminescent horse radish peroxidase (HRP) substrate and MalE as negative control, detected by immuno-blotting with  $\alpha$ -MalE and  $\alpha$ -TfcP as indicated, and image of purified MalE-TfcP in buffer. **b** UV-Vis spectra of purified MalE-TfcP in the oxidised and reduced (after addition of sodium-dithionite) state. Inset shows the absorbance in the 600-750 nm region. Experiment was done using a Shimadzu 1900 spectrophotometer. **c** UV-Vis spectra of purified MalE-TfcP variants in the oxidised and reduced state. Experiments were done using a Tecan200Pro plater reader and, therefore, the spectrum of WT TfcP is included

956 again. **d** EPR spectrum of MalE-TfcP. Spectra were recorded in the oxidised state at 12 K,  
957 0.32 mW microwave power, 1.5 mT modulation amplitude (9.3523 GHz). **e** Redox titration of  
958 MalE-TfcP. The 550 nm absorbance at 23°C is plotted versus the solution potential and fitted to  
959 the Nernst equation. **f** Redox titration of MalE-TfcP following the EPR-intensity at  $g=2.26$  of  
960 samples poised at indicated solution redox potentials.  
961

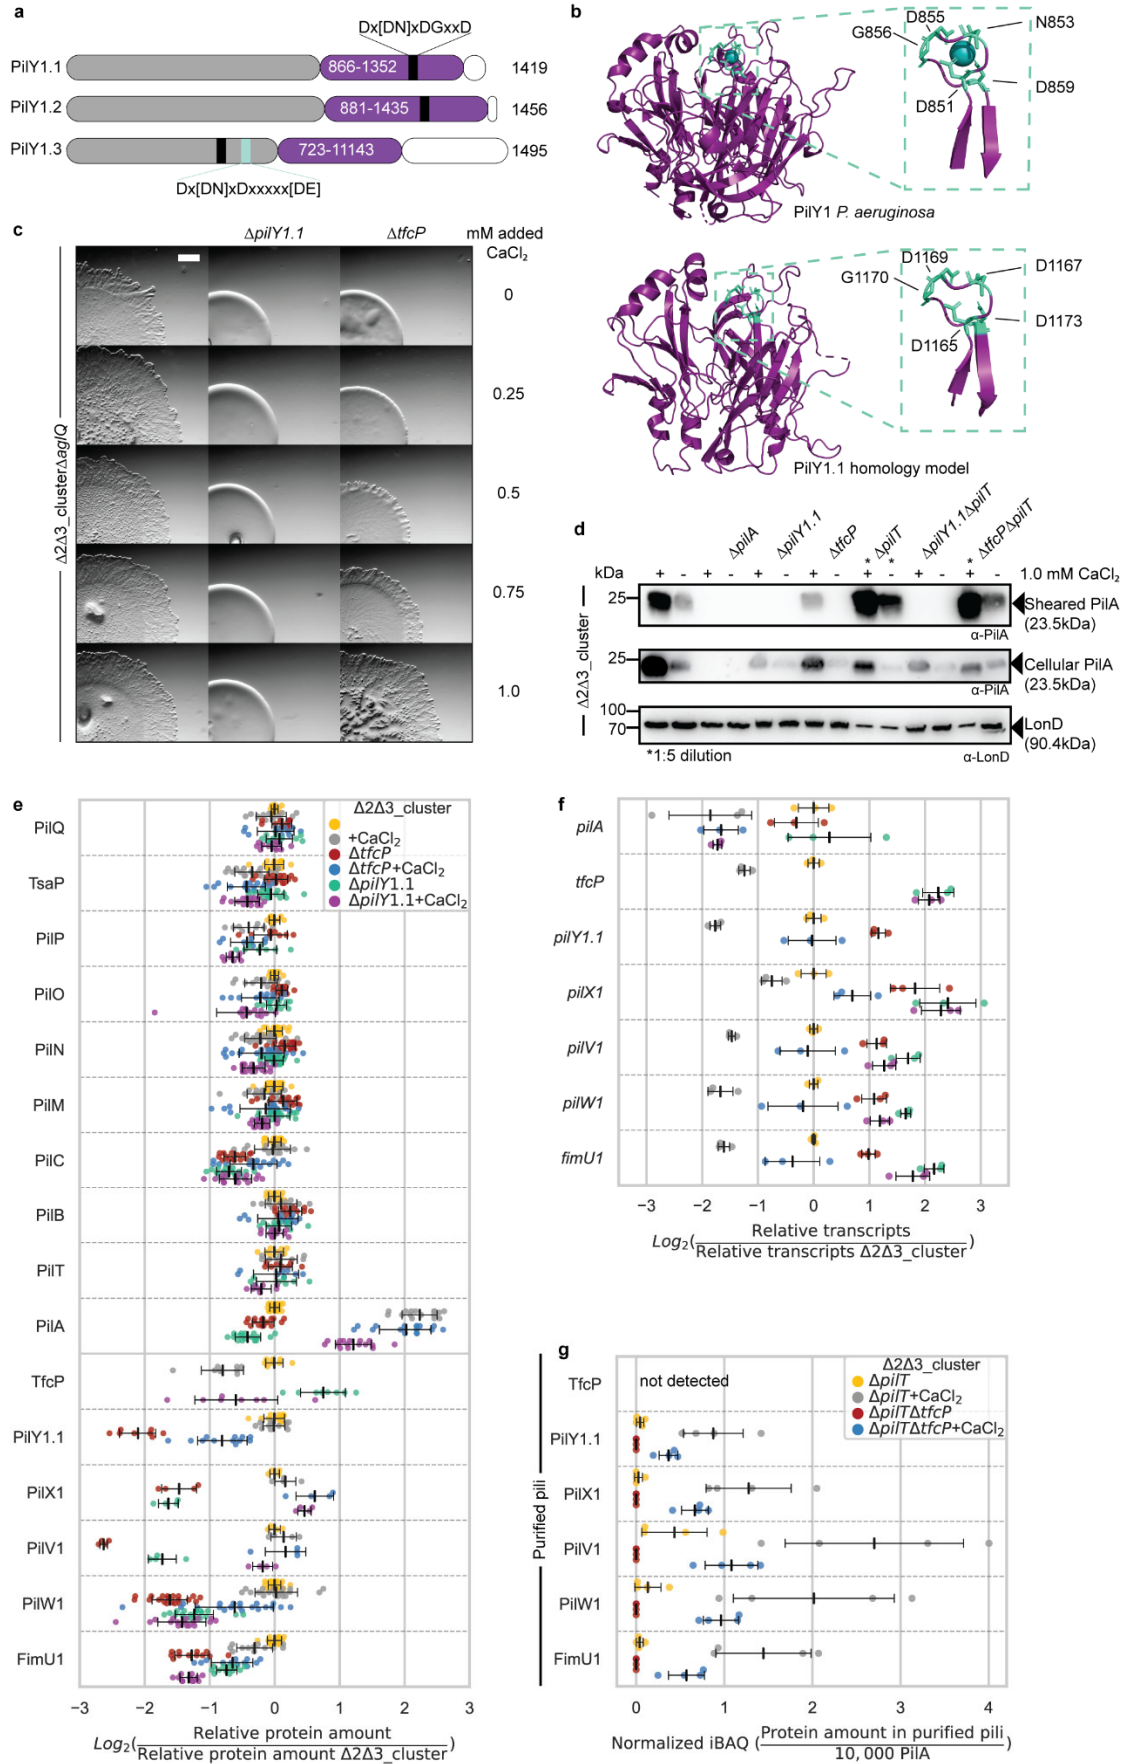

963 **Figure 6. Added CaCl<sub>2</sub> compensates for lack of TfcP.**

964 **a** Domain architecture of PilY1 proteins of *M. xanthus*. Purple, C-terminal PilY1 domain; grey, N-  
965 terminal domains; white; C-terminal sequences. EF hand-like calcium binding motif is in black  
966 together with the consensus sequence; light blue box indicates the second calcium binding motif  
967 in PilY1.3 together with the consensus sequence<sup>25</sup>. **b** Comparison of PilY1 structure of *P.*  
968 *aeruginosa* (PDB: 3HX6)<sup>27</sup> and a homology model of PilY1.1; inset, zoom of calcium binding  
969 motif. **c** Assay for T4aPdM. Cells were grown in 1.0% CTT suspension culture and plated on  
970 0.5% agar supplemented with 0.5% CTT without or with added CaCl<sub>2</sub> and imaged after 24 hrs.  
971 Final concentrations of added CaCl<sub>2</sub> are indicated. Scale bar, 1 mm. **d** Shearing assay for T4aP  
972 formation. T4aP sheared off from ~15 mg cells grown on 1.5% agar supplemented with 1.0%  
973 CTT and 1.0 mM CaCl<sub>2</sub> as indicated, and analysed as in Fig. 2b. **e** Accumulation of proteins of  
974 the T4aPM. Cells were grown in 1.0% CTT suspension culture without or with 1.0 mM added  
975 calcium as indicated. Proteins were quantified as in Fig. 3a. Data for samples without added  
976 CaCl<sub>2</sub> are the same as in Fig. 3a and included for comparison. **f** qRT-PCR analysis of transcript  
977 levels of cluster\_1 genes and *pilA*. Total RNA was isolated from cells grown in 1.0% CTT  
978 suspension culture without or with added calcium as indicated. Transcripts were quantified as in  
979 Fig. 3c. Colour code is as in **e**. Data for samples without added CaCl<sub>2</sub> are the same as in Fig. 3e  
980 and included for comparison. **g** LFQ proteomics of cluster\_1 proteins in purified pili. Pili were  
981 isolated from cells grown on 1.5% agar supplemented with 1.0% CTT without or with added  
982 CaCl<sub>2</sub> as indicated. Normalised iBAQ values were calculated as in Fig. 4e and background  
983 corrected by subtraction of the mean iBAQ value of the four replicates of the relevant negative  
984 control, and rescaled to 10,000 PilA molecules in the same sample. Data for WT<sub>Δ2Δ3</sub> without  
985 added CaCl<sub>2</sub> are the same as in Fig. 4e and included for comparison.  
986

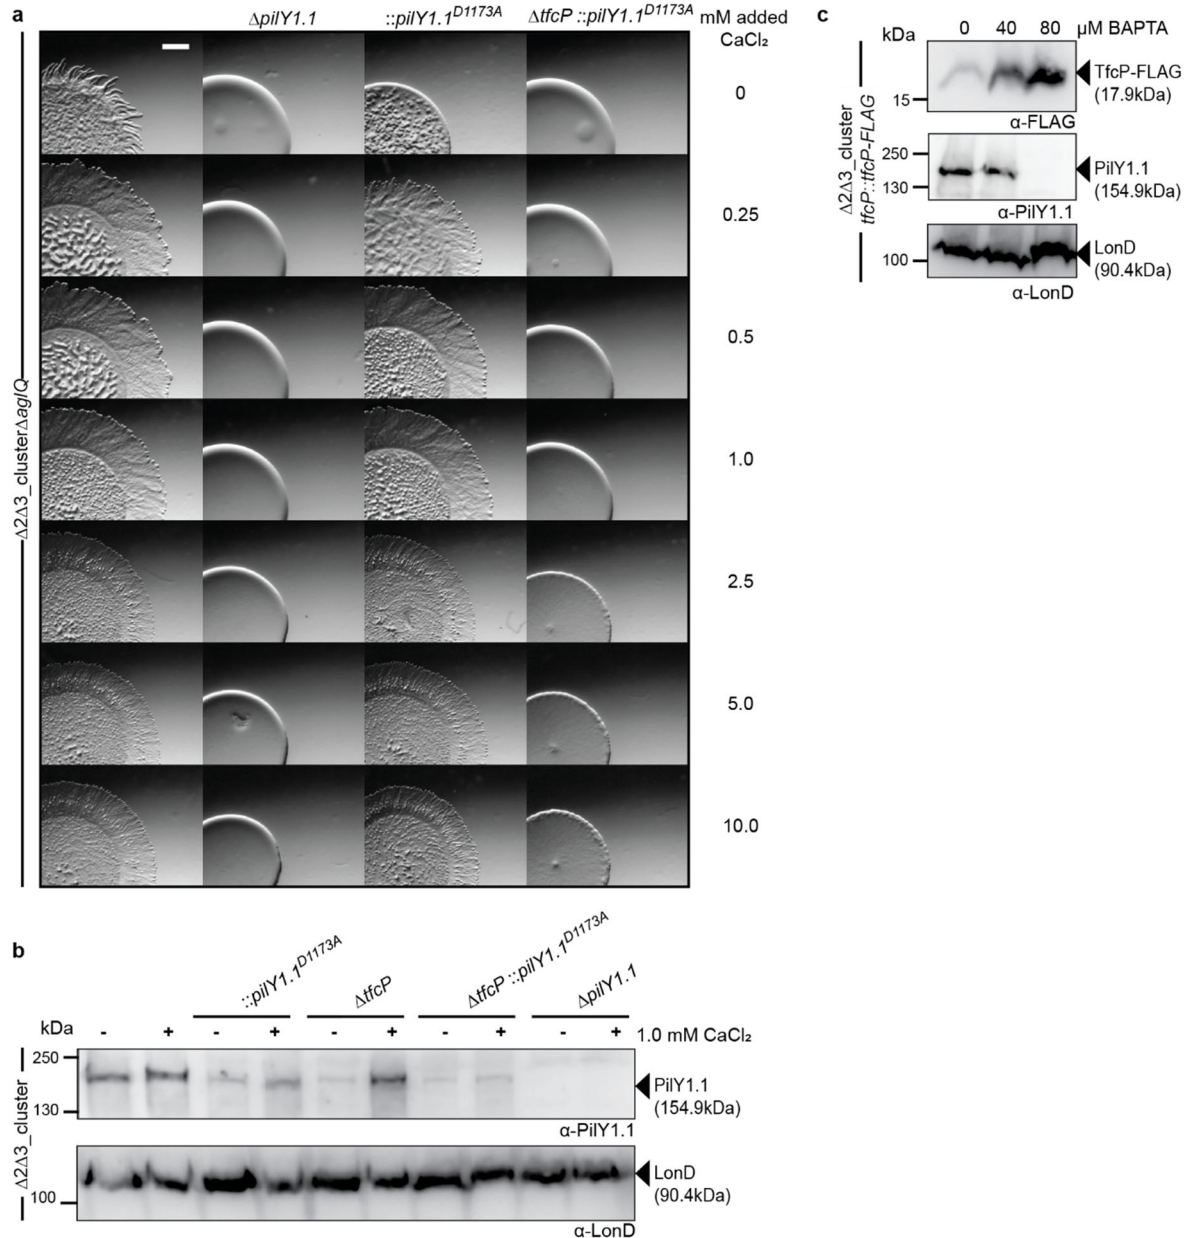

987  
988  
989  
990  
991  
992  
993  
994  
995  
996  
997

**Figure 7. Calcium binding by PilY1.1 is essential for TfcP function.**

**a** Assay for T4aPdM. Cells were grown in 1.0% CTT suspension culture and plated on 0.5% agar supplemented with 0.5% CTT and imaged after 24 hrs. The final concentration of added CaCl<sub>2</sub> is indicated. Scale bar, 1 mm. **b** Accumulation of PilY1.1 variants. Cells were grown in 1.0% CTT suspension culture without or with 1.0 mM CaCl<sub>2</sub>, total cell extract isolated and analysed by immuno-blot as in Fig. 3b. **c** Accumulation of TfcP-FLAG and PilY1.1 in presence of BAPTA. Cells were grown in 1.0% CTT in suspension, exposed to indicated concentrations of BAPTA for 16 hrs, total cell extract isolated, and analysed by immuno-blot as in Fig. 3b.

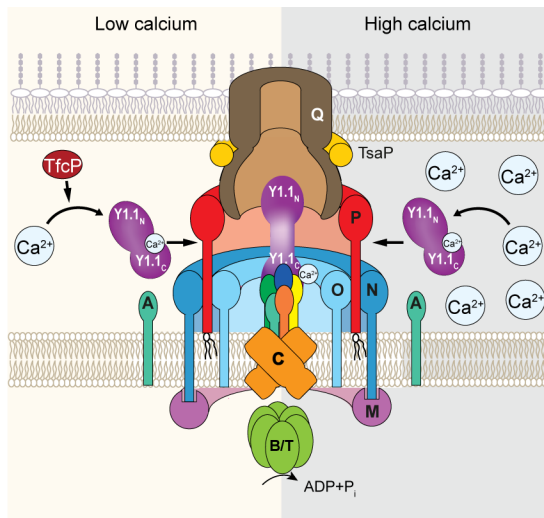

998

999

1000 **Figure 8. Model of TfcP function at low and high calcium concentrations.** For simplicity,

1001 PiiB and PiiT are not shown separately. Y1.1<sub>N</sub> and Y1.1<sub>C</sub> indicate the N- and C-terminal

1002 domains of PiiY1, respectively. The colour code for the four minor pilins is as in Fig. 1b.

1003
